1 **Zebrafish macrophage developmental arrest underlies depletion of microglia and**  
2 **reveals Csf1r-independent metaphocytes**

3

4 Laura E. Kuil<sup>1</sup>, Nynke Oosterhof<sup>1,#</sup>, Giuliano Ferrero<sup>2,#</sup>, Tereza Mikulášová<sup>3</sup>, Martina Hason<sup>3</sup>,  
5 Jordy Dekker<sup>1</sup>, Mireia Rovira<sup>2</sup>, Herma C. van der Linde<sup>1</sup>, Paulina M.H. van Strien<sup>4</sup>, Emma de  
6 Pater<sup>4</sup>, Gerben Schaaf<sup>1</sup>, Eric M.J. Bindels<sup>4</sup>, Valerie Wittamer<sup>2,5,#,\*</sup>, Tjakko J. van Ham<sup>1,#,\*</sup>

7

8

9 <sup>1</sup>Department of Clinical Genetics, Erasmus MC, University Medical Center Rotterdam,  
10 Wytemaweg 80, 3015 CN Rotterdam, The Netherlands.

11 <sup>2</sup>Institut de Recherche Interdisciplinaire en Biologie Humaine et Moléculaire (IRIBHM),  
12 Université Libre de Bruxelles (ULB), Brussels, Belgium

13 <sup>3</sup>Laboratory of Cell Differentiation, Institute of Molecular Genetics of the Czech Academy of  
14 Sciences, Prague 4, Czech Republic <sup>4</sup>Department of Hematology, Erasmus University  
15 Medical Center, Rotterdam, Wytemaweg 80, 3015 CN, The Netherlands.

16 <sup>5</sup>WELBIO, ULB, Brussels, Belgium

17 # These authors contributed equally

18 \* Contact: [t.vanham@erasmusmc.nl](mailto:t.vanham@erasmusmc.nl) or [vwittame@ulb.ac.be](mailto:vwittame@ulb.ac.be)

19

20 **Abstract**

21 Macrophages derive from multiple sources of hematopoietic progenitors. Most macrophages  
22 require colony-stimulating factor 1 receptor (CSF1R), but some macrophages persist in the  
23 absence of CSF1R. Here, we analyzed *mpeg1*:GFP-expressing macrophages in *csf1r*-  
24 deficient zebrafish and report that embryonic macrophages emerge followed by their  
25 developmental arrest. In larvae, *mpeg1*<sup>+</sup> cell numbers then increased showing two distinct  
26 types in the skin: branched, putative Langerhans cells, and amoeboid cells. In contrast,  
27 although numbers also increased in *csf1r*-mutants, exclusively amoeboid *mpeg1*<sup>+</sup> cells were  
28 present, which we showed by genetic lineage tracing to have a non-hematopoietic origin.  
29 They expressed macrophage-associated genes, but also showed decreased phagocytic  
30 gene expression and increased epithelial-associated gene expression, characteristic of  
31 metaphocytes, recently discovered ectoderm-derived cells. We further demonstrated that  
32 juvenile *csf1r*-deficient zebrafish exhibit systemic macrophage depletion. Thus, *Csf1r*  
33 deficiency disrupts embryonic to adult macrophage development. *Csf1r*-deficient zebrafish  
34 are viable and permit analyzing the consequences of macrophage loss throughout life.

35

36

## 37 **Introduction**

38 Tissue resident macrophages (TRMs) are phagocytic immune cells that also contribute to  
39 organogenesis and tissue homeostasis. Therefore, perturbations in TRM production or  
40 activity can have detrimental consequences ranging from abnormal organ development to  
41 neurodegeneration and cancer (Cassetta and Pollard, 2018; Mass et al., 2017; Yang et al.,  
42 2018; Zarif et al., 2014). In vertebrates, including mammals, birds, and fishes, TRMs derive  
43 from successive waves of hematopoiesis that initiate early during development (reviewed in:  
44 (McGrath et al., 2015)). The initial two embryonic waves give rise to primitive macrophages,  
45 born in the embryonic yolk sac in mammals and birds or the rostral blood island (RBI) in  
46 fishes, and erythro-myeloid precursors (EMPs), which also originate in the yolk sac and  
47 expand in the fetal liver of mammals or emerge from the posterior blood island (PBI) of  
48 fishes. A third embryonic wave that generates definitive hematopoietic stem cells (HSCs)  
49 begins in the aorta-gonad-mesonephros (AGM) region, where HSCs bud from the  
50 hemogenic endothelium (Bertrand et al., 2010a; Boisset et al., 2010; Kissa and Herbomel,  
51 2010). In zebrafish, newly born hematopoietic stem cells (HSCs) migrate to the caudal  
52 hematopoietic tissue (CHT), and later seed hematopoietic organs such as the kidney  
53 marrow, which is equivalent to the bone marrow in mammals (Henninger et al., 2017;  
54 Murayama et al., 2006). Most TRM populations are established by the end of fetal life and  
55 are subsequently maintained through the proliferation of local progenitors or through the  
56 partial contribution of bone marrow-derived cells (Liu et al., 2019).

57 During their colonization of the embryo, macrophages acquire distinct properties  
58 adapted to their microenvironment and allowing them to execute tissue niche-specific  
59 functions (Bennett and Bennett, 2019; Gosselin et al., 2014; Gosselin et al., 2017; Lavin et  
60 al., 2014; Matcovitch-Natan, 2016). The ontogeny of TRMs within a specific organ is  
61 heterogeneous and thought to be determined by the availability of the niche and accessibility  
62 of the host tissue (reviewed in: (Guilliams et al., 2020)). The microenvironment has a major  
63 role in determining TRM phenotype and function, largely regardless of ontogeny, but giving  
64 rise to heterogeneous populations of cells (Lavin et al., 2014; Shemer et al., 2018; van de  
65 Laar et al., 2016).

66 Colony stimulating factor 1 receptor (CSF1R) is an evolutionarily conserved regulator  
67 of macrophage development, directly inducing DNA and protein synthesis as well as  
68 proliferation upon ligand binding (Hume et al., 2016; Tushinski and Stanley, 1985).  
69 Recessive and dominant mutations in *CSF1R* can cause severe brain disease (Konno et al.,  
70 2018a; Konno et al., 2018b; Oosterhof et al., 2019a; Rademakers et al., 2011), associated  
71 with lower microglia density (Oosterhof et al., 2018b), but whether such mutations affect  
72 other myeloid cells, and how, remains unknown. Recently, patients carrying homozygous  
73 mutations in *CSF1R* and presenting with both leukodystrophy and osteopetrosis, phenotypes

74 attributed to an absence of TRMs in the brain and bone, have been described (Oosterhof et  
75 al., 2019b). In mice and rats, the absence of CSF1R results in a complete lack of microglia,  
76 Langerhans cells (LCs), and osteoclasts, while other subsets of TRMs are affected to varying  
77 degrees (Cecchini et al., 1994; Dai et al., 2002; Erlich et al., 2011; Ginhoux et al., 2010;  
78 Oosterhof et al., 2018b; Pridans et al., 2018). It is unknown whether CSF1R is required for  
79 the development of early, embryonic TRM precursors and it remains elusive as to why only  
80 specific TRM populations are lacking in the absence of *Csf1r*. Furthermore, it is unclear  
81 whether macrophages that persist in *Csf1r*-deficient mice and rats have a normal  
82 macrophage phenotype. Detailed analysis of the *Csf1r* mutant phenotypes could therefore  
83 contribute to the identification of specific and universal features of organism-wide  
84 macrophage development. In addition, it is important to understand the systemic effects of  
85 CSF1R inhibition on macrophages, as inhibition of CSF1R is a clinical strategy for the  
86 intentional depletion of macrophages in various disease contexts, including Alzheimer's  
87 disease, brain injury and cancer (Edwards et al., 2019; Lloyd et al., 2019; Tap et al., 2015;  
88 Webb et al., 2018).

89 Zebrafish are particularly suitable to study immune cell development *in vivo* as they  
90 develop *ex utero*, are genetically tractable, and are transparent during early development  
91 (Ellett and Lieschke, 2010; Gore et al., 2018). We used our previously generated zebrafish  
92 line that is deficient for both *csf1ra* and *csf1rb* paralogs (*csf1r<sup>DM</sup>*), since the phenotypes of  
93 these fish, such as osteopetrosis and a lack of microglia, resemble those observed in mice,  
94 rats and humans (Caetano-Lopes et al., 2020; Chatani et al., 2011; Dai et al., 2002; Guo et  
95 al., 2019; Meireles et al., 2014; Oosterhof et al., 2019b; Oosterhof et al., 2018b; Pridans et  
96 al., 2018). The strong homology of basic developmental cellular processes has proven this  
97 model as indispensable for the identification of novel basic features of immune cell  
98 development and function (Barros-Becker et al., 2017; Bertrand et al., 2010a; Espin-Palazon  
99 et al., 2014; Kissa and Herbomel, 2010; Madigan et al., 2017; Tamplin et al., 2015; Tyrkalska  
100 et al., 2019).

101 Here, we aimed to determine how and when loss of *Csf1r* affects macrophage  
102 development. We found that primitive myelopoiesis is initially *csf1r*-independent, although  
103 *csf1r<sup>DM</sup>* embryonic macrophages subsequently ceased to divide and failed to colonize  
104 embryonic tissues. Surprisingly, a detailed examination of *csf1r<sup>DM</sup>* larval zebrafish revealed  
105 another wave of *mpeg1+* cells in the skin from 15-days of development onwards, but these  
106 cells lacked the branched morphology typical of Langerhans cells (He et al., 2018). Using  
107 fate mapping and gene expression profiling, we identified *csf1r<sup>DM</sup> mpeg1+* cells as  
108 metaphocytes, a population of ectoderm-derived macrophage-like cells recently reported in  
109 zebrafish (Alemany et al., 2018a; Lin et al., 2019). Extending our analyses, we further  
110 demonstrated that adult *csf1r<sup>DM</sup>* fish exhibit a global defect in macrophage generation. In

111 conclusion, our study highlights distinct requirements for *Csf1r* during macrophage  
112 generation and metaphocyte ontogeny, resolving part of the presumed macrophage  
113 heterogeneity and their sensitivity to loss of *Csf1r*.

## 114 **Results**

### 115 **Zebrafish embryonic macrophages are formed independently of *csf1r* but display** 116 **migration and proliferation defects**

117 To determine whether the earliest embryonic macrophages, called primitive macrophages,  
118 are still formed in the absence of *Csf1r* signaling, we analyzed *csf1r<sup>DM</sup>* zebrafish embryos  
119 carrying the macrophage transgenic reporter *mpeg1:GFP* (Ellett et al., 2011; Oosterhof et al.,  
120 2018b). Zebrafish primitive macrophages are born in the rostral blood island on the yolk and  
121 can be detected by *mpeg1:GFP* expression from 22 hours post fertilization (hpf) as they  
122 migrate on the yolk ball—equivalent to the mammalian yolk sac—and progressively invade  
123 peripheral tissues (Herbomel et al., 1999; Herbomel et al., 2001). These constitute the main  
124 macrophage population during the first 5 days of development (Wu et al., 2018). Indeed, *in*  
125 *vivo* imaging of GFP-expressing macrophages in control embryos showed that, at 24 hpf,  
126 ~13 *mpeg1+* primitive macrophages were present on the yolk, increasing to ~49 cells at 42  
127 hpf (Figure 1A, Video S1) (Ellett et al., 2011). In *csf1r<sup>DM</sup>* embryos, even though primitive  
128 macrophage numbers were slightly lower at 24 hpf (~5 *mpeg1+* cells), macrophage numbers  
129 did not significantly differ from controls at 42 hpf (~46 *mpeg1+* cells) (Figure 1A). This  
130 indicates that *Csf1r* is dispensable for the emergence of primitive macrophages.

131 We next investigated whether embryonic macrophages in *csf1r<sup>DM</sup>* animals retained  
132 the ability to invade peripheral tissues. At 52 hpf, 50 % of *mpeg1+* cells had exited the yolk  
133 epithelium in controls and were observed in the periphery (Figure 1B). In contrast, only 15 %  
134 of all macrophages were found outside of the yolk in *csf1r<sup>DM</sup>* embryos. At this stage,  
135 macrophage numbers were significantly lower in *csf1r<sup>DM</sup>* larvae than controls (Figure 1B, S1).  
136 Migration trajectories of embryonic macrophages into the embryonic tissues, as shown by  
137 maximum intensity projections of images acquired over 16 hours, were more widespread in  
138 controls than *csf1r<sup>DM</sup>* and covered the entire embryo (Figure 1C, Video S2). Thus, although  
139 the generation of embryonic macrophages appeared independent of *csf1r*, after two days of  
140 development macrophage failed to expand in the *csf1r* mutants and their migration was  
141 reduced, suggesting functional deficits caused by the loss of *Csf1r*.

142 We hypothesized that the reduced macrophage numbers in *csf1r* mutants could be  
143 explained by a reduction in their proliferative activity. To test this, we performed live imaging  
144 on *mpeg1+* cells and quantified cell divisions. Between 32 and 48 hpf, the proliferative rates  
145 were not significantly different between control (~12 events) and *csf1r<sup>DM</sup>* embryos (~10  
146 events) (Figure 1D, Video S1). However, whereas control macrophages actively proliferated  
147 between 56 and 72 hpf (~11 % of macrophages divided), *csf1r<sup>DM</sup>* macrophages did not (none

148 of the macrophages divided) (Figure 1E). This indicates that the expansion of primitive  
149 macrophages is halted between 48 and 56 hpf. Thus, while the initial proliferation of  
150 emerging primitive macrophages occurs independent of *csf1r*, by 48 hpf Csf1r signaling  
151 becomes necessary for embryonic macrophage proliferation.

152

### 153 **RNA-sequencing of embryonic macrophages reveals *csf1r*-independent core** 154 **macrophage differentiation**

155 To explore specific developmental and molecular processes affected by the loss of Csf1r  
156 signaling, and to discern a potential effect on proliferation, we performed RNA sequencing on  
157 macrophages isolated from 28 and 50 hpf *mpeg1:GFP* embryos using fluorescence-activated  
158 cell sorting (FACS). These time points were chosen to study the primitive macrophages soon  
159 after their emergence from the RBI (28 hpf) and as they subsequently transition to a tissue  
160 colonizing, migratory phenotype (50 hpf) (Figure 2A). Principal component analysis (PCA) of  
161 the macrophage gene expression data sets showed clustering of triplicate samples based on  
162 genotype (component 1) and developmental stage (component 2) (Figure 2B). This suggests  
163 that, even though gene expression differed between control and *csf1r<sup>DM</sup>* macrophages at  
164 both time points, most of the changes that occurred over time in control embryos also  
165 occurred in *csf1r<sup>DM</sup>* embryos (Figure 2B,C). To determine macrophage identity we analyzed  
166 the expression of genes highly expressed in macrophages, including genes used in zebrafish  
167 as macrophage markers (e.g. *csf1ra*, *mfap4*), chemokine and pathogen recognition receptors  
168 (e.g. *marco*, *mrc1*, *tlr1*), and myeloid transcription factors (e.g. *irf8*, *spi1a*, *cebpb*), but we did  
169 not observe major differences between genotypes (Figure 2D-E). Also, when we compared  
170 our gene expression profiles with a zebrafish macrophage expression profile determined by  
171 single cell RNA-seq (Tang et al., 2017), only ~5 % of the reported 2031 macrophage-specific  
172 genes were differentially expressed in *csf1r<sup>DM</sup>* macrophages, suggesting Csf1r-independent  
173 expression of the majority of these macrophage-expressed genes (Figure 2F). Together, this  
174 shows that *csf1r*-deficient embryonic macrophages display a core gene expression profile  
175 similar to that seen in controls.

176

### 177 **Impaired proliferation of embryonic *csf1r<sup>DM</sup>* macrophages is reflected in their** 178 **transcriptome and proliferation is not restored in microglia**

179 The nature of the differences in gene expression profiles between control and *csf1r<sup>DM</sup>*  
180 macrophages was studied by gene set enrichment analysis (GSEA). GSEA revealed that, at  
181 both time points, *csf1r<sup>DM</sup>* macrophages had lower expression of genes associated with RNA  
182 metabolism and DNA replication (Figure 3A), with transcripts encoding all components of the  
183 DNA replication complex being ~2-fold reduced (Figure S2A, 3B). In addition, *csf1r<sup>DM</sup>*  
184 macrophages showed lower expression of genes in GO classes related to cell cycle at 50 hpf

185 (Figure 3A, S2A). Thus, at 28 hpf, DNA replication genes were downregulated, followed by a  
186 decrease in expression of genes involved in general cell cycle related processes at 50 hpf.  
187 Together, and in line with our *in vivo* findings, these analyses suggest that proliferation is  
188 reduced or halted in *csf1r<sup>DM</sup>* macrophages from 2 dpf onwards.

189 Of the three Csf1r ligand genes, both *csf1a* and *csf1b* are expressed at 20 hpf,  
190 whereas *il34* is not detectable at that time, barely detectable at 24 hpf, and moderately  
191 expressed at 36 hpf (Figure S2C). Therefore, it is possible that the reduced expression of cell  
192 cycle related genes in *csf1r<sup>DM</sup>* macrophages could be attributed largely to a lack of interaction  
193 between the two Csf1 ligands and Csf1r. Additionally, this suggests that these two ligands  
194 likely do not influence the specification of embryonic macrophages at this stage. Previous  
195 analyses of macrophage development in *il34<sup>-/-</sup>* deficient zebrafish around 30 hpf showed  
196 primarily a deficiency in the migration of macrophages across the embryo and into the brain  
197 (Kuil et al., 2019; Wu et al., 2018).

198 Microglia are the first TRM population present during embryonic development and  
199 they are highly proliferative during this time (Ginhoux et al., 2010; Herbomel et al., 2001; Xu  
200 et al., 2016). Therefore, we determined whether loss of Csf1r signaling also affects microglial  
201 proliferation. PcnA/L-plastin double immunostaining in control embryos showed that total  
202 microglia numbers increase between 2 and 4 dpf. At 2 dpf almost no macrophages in the  
203 brain are proliferating, whereas ~ 20 % of the population is at 4 dpf (Figure S2B). In *csf1r<sup>DM</sup>*  
204 larvae a few microglia were occasionally present in the brain between 2 and 4 dpf, however  
205 none were PcnA+ (Figure S2B). EdU pulse labeling experiments, marking cells that  
206 proliferated between 4 and 5 dpf, showed no EdU+ microglia in *csf1r* mutants, suggesting  
207 that *csf1r*-deficient microglia fail to proliferate (Figure 3C). Thus, proliferation is impaired in  
208 both *csf1r<sup>DM</sup>* primitive macrophages and early microglia.

209 Next, we assessed the presence of macrophages in developing *csf1r<sup>DM</sup>* animals by *in*  
210 *vivo* fluorescence imaging of one lateral side of entire, individual larvae on 4 consecutive  
211 days, starting at 5 dpf. We visualized ~450 macrophages in control animals, whereas *csf1r<sup>DM</sup>*  
212 animals contained > 4-fold fewer (~100) (Figure 3D). Over the next 4 days, macrophage  
213 numbers in both groups remained stable (Figure 3D). This suggests that, at this stage, there  
214 is neither proliferative expansion of embryonic macrophages nor supply of macrophages  
215 from an alternative source, causing macrophage numbers in *csf1r<sup>DM</sup>* larvae to remain much  
216 lower than those in controls up to 9 dpf. Together these data indicate that, onwards from the  
217 initiation of embryonic tissue colonization, proliferative expansion of macrophages remains  
218 halted in *csf1r<sup>DM</sup>* animals.

219

220 ***csf1r<sup>DM</sup>* skin lacks highly branched putative Langerhans cells**

221 Given that macrophages are produced by consecutive waves of primitive and definitive  
222 myelopoiesis, and that embryonic *csf1r<sup>DM</sup>* macrophages ceased to proliferate, we wondered  
223 whether macrophages would be present at later developmental stages in *csf1r<sup>DM</sup>* zebrafish.  
224 By live imaging at 20 dpf we detected *mpeg1+* cells in the skin of control animals, as  
225 expected, but also in the skin of *csf1r<sup>DM</sup>* animals (Figure 4A). To pinpoint the emergence of  
226 these *mpeg1+* cells we live imaged entire zebrafish unilaterally from 8 until 24 dpf (Figure  
227 4B). Between 10 and 13 dpf, control *mpeg1+* cell numbers increased ~1.6 fold and *csf1r<sup>DM</sup>*  
228 *mpeg1+* cell numbers increased 2.4 fold (Figure 4B). From 15 to 17 dpf onwards, *mpeg1+*  
229 cell numbers continued to increase exponentially both in controls and in *csf1r<sup>DM</sup>* fish. As we  
230 noticed differences in the size of the zebrafish, as they grew older, both among controls and  
231 mutants, we also plotted *mpeg1+* cell numbers against fish size (Figure 4B). Larval zebrafish  
232 rapidly grow in size, and their size often correlates better with developmental hallmarks than  
233 their age in days (Parichy et al., 2009). In larval fish smaller than 5 mm, *mpeg1+* cell  
234 numbers did not increase, whereas in fish that were larger than 5 mm *mpeg1+* cell numbers  
235 correlated almost linearly with size. Taken together, we show that particularly in larvae older  
236 than 15 dpf, or over 5 mm in size, *mpeg1+* cell numbers increase significantly, independent  
237 of *csf1r* mutation status.

238 Despite the overall similar kinetics of *mpeg1+* cell emergence, we observed major  
239 morphological differences in these cells between control and *csf1r<sup>DM</sup>* animals. In the skin of  
240 22 dpf control zebrafish, we found two distinct cell morphologies: those presenting with a  
241 branched and mesenchymal cell shape reminiscent of mammalian Langerhans cells, the  
242 macrophage population in the epidermis, and those that display a compact, amoeboid  
243 morphology with short, thick, primary protrusions (Figure 4C). In 22 dpf *csf1r<sup>DM</sup>* fish, only the  
244 more amoeboid cell type was present. These persisting amoeboid *mpeg1+* cells in *csf1r*  
245 mutant animals could represent a subtype of macrophages, or skin metaphocytes, a newly  
246 identified macrophage-like cell type (Alemany et al., 2018b; Lin et al., 2019).

247 Metaphocytes are ectoderm-derived cells that display gene expression overlapping  
248 partly with macrophages, including *mpeg1*, but with much lower expression of phagocytosis  
249 genes; these cells also lack a phagocytic response upon infection or injury (Alemany et al.,  
250 2018b; Lin et al., 2019). As metaphocytes have also been reported to migrate faster than  
251 skin macrophages and morphologically resemble the *mpeg1+* cells that remain in *csf1r<sup>DM</sup>*  
252 fish, we used time-lapse imaging and showed that, both in controls and in *csf1r<sup>DM</sup>* fish, the  
253 smaller, amoeboid *mpeg1+* cells were highly motile (Video S3) (Lin et al., 2019). In contrast,  
254 the branched *mpeg1+* cells that were found only in controls presented long, continuously  
255 extending and retracting protrusions and an evenly spaced distribution, but were largely  
256 confined to their location during 3-hour imaging periods. These highly branched  
257 macrophages, which were absent in *csf1r<sup>DM</sup>* fish, were located in the skin epidermis and,



258 based on their location, morphology, migration speed, and behavior, may represent the  
259 zebrafish counterpart to mammalian Langerhans cells (Video S3) (Lugo-Villarino et al.,  
260 2010). In support of this notion, branched *mpeg1*<sup>+</sup> cells were hardly detected in the skin of  
261 zebrafish deficient for interleukin-34 (Figure S3A; 4C), the *Csf1r* ligand that selectively  
262 controls the development of Langerhans cells in mice (Greter et al., 2012; Wang et al.,  
263 2012). In larval zebrafish, *csf1a* and *csf1b* expression were detected in skin (Figure S2D),  
264 more specifically in interstripe iridophores and hypodermal and fin cells (Patterson and  
265 Parichy, 2013). Although we found that *il34* was also expressed in adult skin, this expression  
266 was about 10-fold lower than that of *csf1a* or *csf1b* (Figure S2D). However, our *in vivo*  
267 imaging data suggests that the loss of *Il34*, but not of both *Csf1a* and *Csf1b*, affects  
268 branched skin macrophages in particular (Figure S3B).

269

### 270 **Remaining *mpeg1*<sup>+</sup> cells in *csf1r*<sup>DM</sup> skin are metaphocytes**

271 We reasoned that macrophages, and/or possibly Langerhans cells, could be absent in  
272 *csf1r*<sup>DM</sup> and *il34* mutant skin, and that remaining *mpeg1*<sup>+</sup> cells may be metaphocytes. Unlike  
273 macrophages, metaphocytes are of non-hematopoietic, likely ectodermal origin (Lin et al.,  
274 2019). We recently proposed that skin macrophages and metaphocytes, based on these  
275 different ontogenies, could be discriminated in the adult zebrafish using the Tg(*kdr1:Cre*;  
276 *βactin2:loxP-STOP-loxP-DsRed*) fate-mapping model that labels EMPs, HSCs and their  
277 progenies (Bertrand et al., 2010a; Ferrero et al., 2018). Genetic, permanent labeling with  
278 DsRed of adult leukocytes, including branched skin macrophages is induced by constitutive  
279 expression of Cre recombinase in endothelial cells and hemogenic endothelium (Bertrand et  
280 al., 2010a). As suggested by restricted expression of the metaphocyte marker *cldnh* in  
281 *mpeg1*-GFP<sup>+</sup>DsRed<sup>-</sup> cells, non-hematopoietic metaphocytes lack DsRed labeling (Ferrero et  
282 al 2020). The presence or absence of DsRed expression could thus be used to discriminate  
283 between metaphocytes (GFP<sup>+</sup>DsRed<sup>-</sup>) and macrophages (GFP<sup>+</sup>DsRed<sup>+</sup>). Of note, a possible  
284 caveat is that *mpeg1*<sup>+</sup> primitive macrophages, which derive directly from *kdr1*-negative  
285 mesoderm, are also not marked by DsRed in this setting, which could complicate the  
286 interpretation of results. However, as we previously documented, there seems to be no  
287 contribution from primitive hematopoiesis to *mpeg1*-expressing cells in the adult skin (Ferrero  
288 et al., 2020). In addition, primitive macrophages appear virtually absent in *Csf1r*-deficient  
289 zebrafish, thus making this approach suitable to address the identity of *mpeg1*<sup>+</sup> cells in  
290 *csf1r*<sup>DM</sup> skin. We generated *csf1r*-deficient animals carrying these three transgenes and  
291 examined their skin by confocal imaging. In control adult zebrafish skin, populations both of  
292 GFP<sup>+</sup>DsRed<sup>+</sup> and of GFP<sup>+</sup>DsRed<sup>-</sup> cells were present, while only GFP<sup>+</sup>DsRed<sup>-</sup> cells could be  
293 detected in *csf1r*<sup>DM</sup> animals (Figure 5A). This phenotype was further validated by flow  
294 cytometry analysis, showing a ~90% decrease in the GFP<sup>+</sup>DsRed<sup>+</sup> population in *csf1r*<sup>DM</sup>

295 zebrafish skin but no change in the frequency of GFP<sup>+</sup>DsRed<sup>-</sup> cells (Figure 5B). Collectively,  
296 these results suggest that the generation of skin definitive macrophages is largely *Csf1r*-  
297 dependent and point to metaphocytes as the remaining *mpeg1*<sup>+</sup> cells in *csf1r*<sup>DM</sup> skin.

298 To further characterize cell identity, we FAC-sorted GFP<sup>+</sup>DsRed<sup>+</sup> and GFP<sup>+</sup>DsRed<sup>-</sup>  
299 cells from control fish skin and GFP<sup>+</sup>DsRed<sup>-</sup> cells from *csf1r*<sup>DM</sup> skin and performed bulk RNA  
300 sequencing. PCA shows clustering of duplicates and segregation of GFP<sup>+</sup>DsRed<sup>-</sup> and  
301 GFP<sup>+</sup>DsRed<sup>+</sup> (PC1) and genotype (PC2) (Figure 5C). Consistent with their expected  
302 hematopoietic identity, GFP<sup>+</sup>DsRed<sup>+</sup> cells expressed the pan-leukocyte marker *ptprc* (Figure  
303 S5A). In contrast, GFP<sup>+</sup>DsRed<sup>-</sup> cells were negative for this marker. To address whether  
304 GFP<sup>+</sup>DsRed<sup>-</sup> cells overlap with metaphocytes, we selected genes expressed at higher levels  
305 in zebrafish metaphocytes than in macrophages, LCs and neutrophils (Lin et al., 2019) (TPM  
306 logFC > 2), and analyzed their expression in our data. This revealed that GFP<sup>+</sup>DsRed<sup>-</sup> cells  
307 display a robust “metaphocyte” gene signature (e.g. *cdh1*, *epcam*, *cldnh*, *cd4-1*), regardless  
308 of their genotype (Figure 5 D-E). Additionally, many genes involved in phagocytosis and  
309 engulfment were downregulated in GFP<sup>+</sup>DsRed<sup>-</sup> cells (e.g. *mertka*, *havcr1*, *stab1*, Figure 5F),  
310 as were genes that were previously shown to be expressed at lower levels in metaphocytes  
311 than in LCs and neutrophils (e.g. *itgb7*, *cdk1*, *cmklr1*, *cebpb*, Figure S5B). In line with the  
312 transcriptome similarities previously reported for metaphocytes and LCs, all cell populations  
313 in our analyses express *mpeg1* as well as genes related to antigen presentation (*mhc2dab*,  
314 *cd74a*, *cd83*) (Figure S5A). Together, these findings validate the qualification of skin  
315 GFP<sup>+</sup>DsRed<sup>-</sup> cells as metaphocytes. Moreover, further analysis showed no major changes in  
316 the transcriptome of metaphocytes in the absence of *csf1r*, as only relatively few genes (359  
317 out of 20,382) were found to differ significantly in expression between control and *csf1r*<sup>DM</sup>  
318 GFP<sup>+</sup>DsRed<sup>-</sup> cells (Figure 5G). Unexpectedly, many of these genes are involved in pigment  
319 cell differentiation. Taken together with our imaging analyses (Figure 4, 5A), these data show  
320 that the skin of *csf1r*<sup>DM</sup> zebrafish lack *mpeg1*<sup>+</sup> macrophages, but exclusively contain *mpeg1*<sup>+</sup>  
321 metaphocytes, which are not reliant on *Csf1r*-signaling.

322

### 323 ***Csf1r*<sup>DM</sup> fish lack most mononuclear phagocytes**

324 We wondered whether the macrophage deficiency observed in the skin represents a general  
325 feature of *csf1r*<sup>DM</sup> fish. To address this question, we quantified total *mpeg1*<sup>+</sup> cell numbers in  
326 33 dpf and 1.5 months post fertilization (mpf) (juvenile zebrafish: between 30-90 dpf) control,  
327 *csf1r*<sup>DM</sup> and *il34*<sup>-/-</sup> fish by FACS. Fish deficient for *il34* were included as an extra control,  
328 since they exhibit a selective loss of branched skin macrophages and contain lower  
329 embryonic microglia numbers, but retain other macrophage populations (Figure 4C) (Kuil et  
330 al., 2019; Wu et al., 2018). Indeed, *mpeg1*<sup>+</sup> cell numbers, with macrophage scatter  
331 properties, obtained from whole *csf1r*<sup>DM</sup> animals, were much lower than those in controls and

332 *il34* mutants (Figure S4A-B). These findings are analogous to results reported for various  
333 organs of *Csf1r*-deficient mice and rats (Dai et al., 2002; Pridans et al., 2018). We next  
334 performed bulk RNA-sequencing on the total population of *mpeg1*<sup>+</sup> cells isolated from  
335 controls, *csf1r*<sup>DM</sup>, and *il34*<sup>-/-</sup> (Figure 6A). PCA showed clustering of triplicates and segregation  
336 based on genotype (component 1: *csf1r*<sup>DM</sup> versus controls/*il34*<sup>-/-</sup>, component 2: *il34* mutants  
337 versus controls) (Figure 6B). In addition, gene expression profiling identified transcriptional  
338 programs consistent with phagocytic macrophages in control and *il34*<sup>-/-</sup> *mpeg1*<sup>+</sup> cells, but  
339 profiles consistent with only metaphocytes in *csf1r*<sup>DM</sup> cells (Figure 6C-E). As overall *il34*<sup>-/-</sup>  
340 animals have a relatively small and selective macrophage depletion, we argue that this could  
341 have prevented the detection of a metaphocyte signature. Collectively, this suggests that  
342 *csf1r*<sup>DM</sup> fish specifically exhibit a profound deficiency in mononuclear phagocytes, whereas  
343 numerous remaining *mpeg1*<sup>+</sup> cells appear to be metaphocytes rather than macrophages.

344 We further tested this possibility by lineage-tracing and surveyed, through flow  
345 cytometry, the presence of GFP<sup>+</sup>DsRed<sup>+</sup> macrophages and GFP<sup>+</sup>DsRed<sup>-</sup> metaphocytes  
346 among adult organs isolated from control and *csf1r*<sup>DM</sup> fish. As previously reported, in the  
347 zebrafish brain, primitive hematopoiesis-derived *mpeg1*<sup>+</sup> microglia are completely replaced  
348 by HSC-derived *mpeg1*<sup>+</sup> cells, and therefore all adult microglia, as well as CNS-associated  
349 macrophages are GFP<sup>+</sup>DsRed<sup>+</sup> (Ferrero et al., 2018). In addition, the lack of GFP<sup>+</sup>DsRed<sup>-</sup>  
350 cells in the adult brain indicates that metaphocytes are not present in the central nervous  
351 system (Figure 6F). Brains of *csf1r*<sup>DM</sup> zebrafish were largely devoid of GFP<sup>+</sup>DsRed<sup>+</sup> cells  
352 (Figure 6F), in line with our previous studies (Oosterhof et al., 2019; Oosterhof et al., 2018).  
353 Similarly, livers from control and *csf1r*<sup>DM</sup> animals contained solely GFP<sup>+</sup>DsRed<sup>+</sup> cells, which  
354 were virtually absent in *csf1r*<sup>DM</sup> animals (Figure 6G). The intestine on the other hand  
355 contained both GFP<sup>+</sup>DsRed<sup>+</sup> and GFP<sup>+</sup>DsRed<sup>-</sup> cells (Figure 6H). However, these  
356 GFP<sup>+</sup>DsRed<sup>+</sup> cells were lost and GFP<sup>+</sup>DsRed<sup>-</sup> cell numbers were increased in *csf1r*<sup>DM</sup>. As the  
357 presence of metaphocytes was reported in skin but also in the intestine (Ferrero et al., 2020;  
358 Lin et al., 2019), intestinal GFP<sup>+</sup>DsRed<sup>-</sup> cells are likely also *csf1r*-independent metaphocytes.  
359 In all, *mpeg1*<sup>+</sup> macrophages are largely *Csf1r*-dependent, whereas *mpeg1*<sup>+</sup> cells present in  
360 the skin and intestine are *Csf1r*-independent non-hematopoietic metaphocytes.

361

362

## 363 Discussion

364 Here, we showed that embryonic macrophages, develop, proliferate, and also initially acquire  
365 macrophage behavior and gene expression profile independently of *Csf1r*. However, without  
366 functional *Csf1r*, these cells subsequently fail to distribute across the embryo and cease to  
367 expand in numbers. This phenotype explains particularly the strong effect on microglial  
368 precursors, as these invade the brain and expand in numbers early in embryonic

369 development and macroglia are absent throughout life in zebrafish, mice, rats and humans  
370 deficient for CSF1R. Around 15 days of age, however, a strong increase in *mpeg1+*  
371 macrophages in skin was detected by *in vivo* imaging in control but also in *csf1r<sup>DM</sup>* animals.  
372 Nevertheless, skin of both *csf1r<sup>DM</sup>* and mutants for the Csf1r ligand Il34 lacked the branched  
373 macrophages, which were present in controls, and only contained amoeboid *mpeg1+* cells.  
374 Based on their non-hematopoietic origin and shared transcriptome profile, we identified these  
375 cells as metaphocytes. As metaphocytes share markers, morphology, and gross behavior  
376 with macrophages, they are easily mistaken for macrophages. We further showed that  
377 *csf1r<sup>DM</sup>* adults lacked virtually all blood-derived *mpeg1+* mononuclear phagocytes, revealing  
378 the presence of *mpeg1+* metaphocytes in the gut, as well as in the skin. Our data shows that  
379 in zebrafish Csf1r is critical for generation of both embryonic and adult macrophages, but is  
380 dispensable for the development of metaphocytes. Therefore, *csf1r*-deficient zebrafish are  
381 macrophage-less in most organs, and as they are viable, enable us to study the *in vivo*  
382 consequences of the absence of macrophages for developmental and homeostatic cellular  
383 processes.

384 Two recent studies identified metaphocytes in zebrafish using distinct lineage tracing  
385 techniques, namely laser-mediated localized Cre-activation and CRISPR/Cas9 mediated  
386 genetic scarring followed by single cell DNA sequencing (Alemany et al., 2018b; Levraud and  
387 Herbomel, 2019; Lin et al., 2019). Metaphocytes show reduced expression of engulfment  
388 genes, do not show a phagocytic response to injury or bacterial infection, have a rounded  
389 morphology and are highly motile (Alemany et al., 2018b; Lin et al., 2019). Our transcriptome  
390 analysis showed high resemblance between metaphocytes and the remaining *mpeg1+* cells  
391 in *csf1r<sup>DM</sup>* zebrafish (total juvenile population and isolated from adult skin). Control and  
392 *csf1r<sup>DM</sup>* metaphocytes showed overall high similarity, but *csf1r<sup>DM</sup>* metaphocytes showed lower  
393 expression of genes involved in pigment cell differentiation. It is possible that this is an  
394 indirect consequence of the altered pigmentation status of *csf1r<sup>DM</sup>* deficient zebrafish, since  
395 they lack most of their xantophores, and lack stripes due to abnormal melanocyte patterning.  
396 As markers labeling macrophages will likely also label metaphocytes, this could perhaps  
397 explain the presumed incomplete depletion of macrophages in *Csf1r* mutant animals, or after  
398 CSF1R pharmacological inhibition (Dai et al., 2002; Erblich et al., 2011; Pridans et al., 2018).  
399 Even though, particularly *in vitro*, CSF1R is considered essential for macrophage  
400 development, macrophages are nevertheless detected, in numbers ranging between 10-70%  
401 of the numbers found in controls, in tissues, other than brain, epidermis and bone, of *Csf1r*-  
402 deficient mice and rats (Dai et al., 2002; Pridans et al., 2018). Therefore, at least in zebrafish,  
403 macrophage numbers in *Csf1r*-deficient mutants were initially overestimated (Oosterhof et  
404 al., 2018a). As *CSF1R* mutations cause pleiotropic effects on various tissues in vertebrates  
405 and in human disease, that are likely caused by the absence of macrophages, our results

406 further stress the importance of macrophages for development and homeostatic regulation of  
407 tissues. In addition, this raises the question whether metaphocytes exist in mammals  
408 (Oosterhof et al., 2019b; Oosterhof et al., 2018b).

409 In mouse *Csf1r* knockouts embryonic macrophages were reported to be largely  
410 absent from the yolk sac at E12.5 (Ginhoux et al., 2010). However, at E10.5 embryonic  
411 macrophages normally have already migrated away to the fetal liver and embryonic organs  
412 (Stremmel et al., 2018). Therefore, it is unknown whether primitive macrophages would be  
413 present in *Csf1r*-deficient mice at a stage earlier than E10.5 and can be generated  
414 independently of *Csf1r*. In *csf1r<sup>DM</sup>* fish we found initially normal embryonic macrophage  
415 numbers, but at 2 – 2.5 dpf, concordant with E12-13 in mice, we also found reduced  
416 macrophage numbers compared to controls. It remains to be determined whether CSF1R  
417 signaling is essential for embryonic development in mice and other mammals at earlier  
418 stages as well.

419 Homozygous mutations in *CSF1R* cause severe congenital brain disease with  
420 osteopetrosis, and absence of microglia (Monies et al., 2017; Oosterhof et al., 2019b). Our  
421 data in zebrafish show multiple *Csf1r*-dependent steps of early microglia development that  
422 together illustrate how CSF1R-deficiency could underlie the absence of microglia already  
423 early in development. In zebrafish, only few *Csf1r*-deficient microglial progenitors reach the  
424 developing brain, since they stop to expand, and they are unable to respond to neuronal  
425 expressed Interleukin-34, which normally facilitates brain colonization (Greter et al., 2012;  
426 Kuil et al., 2018; Wang et al., 2012; Wu et al., 2018). Thereafter, these few microglia do not  
427 expand, which eventually leads to their extinction. We propose that such a mechanism may  
428 underlie the absence of microglia, and osteoclasts, in patients with homozygous mutations in  
429 *CSF1R*.

430 We find in *il34<sup>-/-</sup>* zebrafish that branched skin macrophages are lacking, but we did not  
431 find substantially lower numbers of macrophages or obvious gene expression changes  
432 overall, as in *csf1r<sup>DM</sup>* zebrafish. This phenotype is reminiscent of that of *Il34* mutant mice that  
433 selectively lack microglia and Langerhans cells (Greter et al., 2012; Wang et al., 2012).  
434 Previous studies claimed skin *mpeg1+* hematopoietic branched cells in zebrafish to be  
435 Langerhans cells (He et al., 2018; Lin et al., 2019). It remains unclear whether these are true  
436 Langerhans cells, as there is no known zebrafish ortholog of langerin (CD207), the main  
437 marker of LCs in humans and mice. LCs are likely to exist in zebrafish, as Birbeck granules,  
438 the morphological markers of LCs, have been identified in zebrafish skin macrophages  
439 (Lugo-Villarino et al., 2010), and we recently demonstrated that zebrafish branched skin  
440 macrophages, develop independently of the transcription factor *lrf8* (Ferrero et al., 2020),  
441 similar to mammalian LCs (Chopin et al., 2013; Hambleton et al., 2011). Their dependence  
442 on *Il34* provides additional evidence for the conservation of LCs in zebrafish. The effect of

443 *Il34* loss on macrophage development is relatively subtle, and overall gene expression of  
444 *mpeg1+* cells in *il34* mutants is likely to be dominated by gene expression from all *Il34*-  
445 independent macrophage populations and the effect of the loss of branched skin  
446 macrophages is therefore masked in the bulk RNA expression.

447 TRMs retain the ability to proliferate, partly due to the relief of transcriptional  
448 suppression of proliferative enhancers by MAFB (Soucie et al., 2016). Our findings suggest  
449 that *Csf1r* plays a central role in the maintenance of macrophage proliferative capacity. Our  
450 embryonic macrophage transcriptome analysis revealed two-fold lower expression of the  
451 majority of DNA replication genes in *csf1r<sup>DM</sup>* embryos, pointing towards a *Csf1r*-dependent  
452 induction of DNA replication, underlying the lack of macrophage proliferation. CSF1 can  
453 indeed rapidly stimulate S-phase entry and DNA replication of macrophages *in vitro*  
454 (Tushinski and Stanley, 1985). The *Csf1r*-independent proliferation of the earliest primitive  
455 macrophages on the yolk, could be explained by signaling through other members of the type  
456 III receptor tyrosine kinase family, including *Csf3r*, *Flt3*, or *C-kit*, of which two in zebrafish  
457 have been shown to be involved in the expansion of primitive macrophages (*Flt3*) or HSPCs  
458 (*Kitb*) (Bartelmez and Stanley, 1985; He et al., 2014; Mahony et al., 2018; Sarrazin et al.,  
459 2009; Williams et al., 1992). This could explain how the initial proliferation of progenitors is  
460 independent of *Csf1r* while later differentiation then becomes dependent.

461 In sum, our work provides new insight into the dynamics of embryonic and adult  
462 macrophage development, but also metaphocyte ontogeny in zebrafish, as well as the  
463 developmental requirements for *Csf1r* therein. The *csf1r<sup>DM</sup>* zebrafish are highly suitable for  
464 studying the effects of macrophage absence systemically and metaphocyte function in  
465 isolation. In addition, we provide an approach to discern *Csf1r*-independent metaphocytes  
466 from *Csf1r*-dependent macrophages. Our findings here provide insight into the mechanism  
467 that could also underlie the absence of microglia in *CSF1R*-related leukodystrophy and could  
468 help predict the effects on other TRM populations in response to *CSF1R* mutations or  
469 pharmacological inhibition.

470

## 471 **Materials and Methods**

| Key Resources Table                |             |                     |             |                        |
|------------------------------------|-------------|---------------------|-------------|------------------------|
| Reagent type (species) or resource | Designation | Source or reference | Identifiers | Additional information |
|                                    |             |                     |             |                        |

|                             |                                                                          |                        |                                             |             |
|-----------------------------|--------------------------------------------------------------------------|------------------------|---------------------------------------------|-------------|
| gene ( <i>Danio rerio</i> ) | Tg(mpeg1:EGFP)gl22                                                       | Ellet et al., 2011     | gl22Tg<br>RRID:ZFIN_ZDB-ALT-120117-1        | Transgenic  |
| gene ( <i>Danio rerio</i> ) | <i>il34</i> <sup>re03/re03</sup>                                         | Kuil et al., 2019      | re03<br>RRID:ZFIN_ZDB-ALT-190814-11         | Mutant      |
| gene ( <i>Danio rerio</i> ) | <i>csf1rb</i> <sup>re01/re01</sup>                                       | Oosterhof et al., 2018 | re01<br>RRID:ZFIN_ZDB-ALT-180807-1          | Mutant      |
| gene ( <i>Danio rerio</i> ) | <i>csf1rb</i> <sup>sa1503/sa1503</sup>                                   | ZIRC, This paper       | sa1503<br>RRID:ZFIN_ZDB-ALT-120411-187      | Mutant      |
| gene ( <i>Danio rerio</i> ) | <i>csf1ra</i> <sup>j4e1/j4e1</sup>                                       | Parichy et al., 2000   | j4e1<br>RRID:ZFIN_ZDB-ALT-001205-14         | Mutant      |
| gene ( <i>Danio rerio</i> ) | <i>Et(shhb:KaIT A4,UAS-E1b:mCherry)</i> <sub>zf279</sub>                 | Distel et al., 2009    | zf279Et<br>RRID:ZFIN_ZDB-ALT-120221-7       | Transgenic  |
| gene ( <i>Danio rerio</i> ) | Tg( <i>kdrf:Cre</i> ) <sup>s8</sup> <sub>98</sub>                        | Bertrand et al., 2010  | s898Tg<br>RRID:ZFIN_ZDB-ALT-100419-3        | Transgenic  |
| gene ( <i>Danio rerio</i> ) | Tg( <i>actb2:loxP-STOP-loxP-DsRed</i> <sup>express</sup> ) <sub>d5</sub> | Bertrand et al., 2010  | sd5Tg<br>RRID:ZFIN_ZDB-ALT-100301-1         | Transgenic  |
| antibody                    | anti-PCNA (mouse monoclonal)                                             | Agilent                | Agilent Cat# M0879,<br>RRID:AB_2160651      | IHC (1:250) |
| antibody                    | Anti-DsRed (rabbit polyclonal)                                           | Takara Bio Clontech    | Takara Bio Cat# 632496,<br>RRID:AB_10013483 | IHC (1:500) |
| antibody                    | Anti-GFP (chicken polyclonal)                                            | Abcam                  | Abcam Cat# ab13970,<br>RRID:AB_300798       | IHC (1:500) |

|                         |                          |                                             |                                                                                             |                                            |
|-------------------------|--------------------------|---------------------------------------------|---------------------------------------------------------------------------------------------|--------------------------------------------|
| antibody                | anti-Lplastin (rabbit)   | gift from Yi Feng, University of Edinburgh  |                                                                                             | IHC (1:500)                                |
| commercial assay or kit | Click-iT™ EdU            | Invitrogen                                  | C10340                                                                                      | Cell Proliferation Kit for Imaging         |
| software, algorithm     | Prism 5                  | Graphpad                                    | GraphPad Prism, RRID:SCR_002798                                                             | Data visualization and statistics software |
| software, algorithm     | Leica                    | LASX                                        | Leica Application Suite X, RRID:SCR_013673                                                  | Microscope image processing software       |
| software, algorithm     | FIJI                     | ImageJ                                      | National Center for Microscopy and Imaging Research: ImageJ Mosaic Plugins, RRID:SCR_001935 | Image analysis software                    |
| software, algorithm     | FlowJo v10               | Treestar                                    | FlowJo, RRID:SCR_008520                                                                     | FACS software                              |
| software, algorithm     | R (Bioconductor package) | Durinck et al., 2009; Robinson et al., 2010 | edgeR, RRID:SCR_012802<br>GAGE, RRID:SCR_017067                                             | Transcriptomics data analysis software     |

472  
473  
474

## 475 **Animals**

476 Zebrafish deficient for both *Csf1ra* (*csf1ra*<sup>j4e1/j4e1</sup>) and *Csf1rb* (*csf1rb*<sup>re01/re01</sup>), *csf1r*<sup>DM</sup>, were  
477 used as we described previously (Oosterhof et al., 2018b). The *csf1ra*<sup>j4e1/j4e1</sup> mutant was  
478 combined with a second *csf1rb* allele, *csf1rb*<sup>sa1503/sa1503</sup>, affecting an essential splice site,  
479 leading to a premature STOP codon, for flow cytometry and lineage tracing experiments.  
480 Zebrafish deficient in *Csf1a/Csf1b* (*csf1a*<sup>re05/re05</sup>; *csf1b*<sup>re07/re07</sup>) or *Il34* (*il34*<sup>re03/re03</sup>) are  
481 described previously (Kuil et al., 2019). *Tg(mpeg1:egfp); Et(shhb:KaTA4,UAS-*  
482 *E1b:mCherry)*<sup>z1279</sup>) were used as control animals (Ellett et al., 2010; van Ham et al., 2014).  
483 For the genetic lineage tracing the following transgenic lines were crossed: *Tg(kdrl:Cre)*<sup>s898</sup>  
484 and *Tg(actb2:loxP-STOP-loxP-DsRed<sup>express</sup>)<sup>sd5</sup>* (Bertrand et al., 2010b). All control animals



485 used throughout the manuscript are *wild-type* controls carrying the trangene reporter  
486 constructs only. Adult and larval fish were kept on a 14h/10h light–dark cycle at 28°C. Larvae  
487 were kept in HEPES-buffered E3 medium. Media was refreshed daily and at 24 hpf 0.003%  
488 1-phenyl 2-thiourea (PTU) was added to prevent pigmentation. Animal experiments were  
489 approved by the Animal Experimentation Committees of the Erasmus MC and ULB.

490

#### 491 **Live imaging**

492 Intravital imaging in zebrafish brains was largely performed as previously described (van  
493 Ham et al., 2014). Briefly, zebrafish larvae were mounted in 1.8% low melting point agarose  
494 containing 0.016% MS-222 as sedative and anesthetic in HEPES-buffered E3. The imaging  
495 dish containing the embedded larva was filled with HEPES-buffered E3 containing 0.016%  
496 MS-222.

497 For the experiment where larvae were followed over time between 5 and 9 dpf, larvae  
498 were removed from the low melting point agarose after imaging and put individually in wells  
499 of a 6 wells-plate containing HEPES-buffered E3 with PTU in which they were fed  
500 paramecia.

501 For the experiment with larval fish between 8 and 24 dpf fish were kept in E3 medium  
502 until 5 dpf. From 5 dpf onwards, *wild-type* controls, *il34*, and *csf1r* mutants were raised under  
503 standard conditions (14h/10h light–dark cycle, 28°C) in the aquaria (Tecniplast, Italy) in the  
504 Erasmus MC fish facility and fed paramecia and dry food. From 13 dpf onwards they were  
505 also fed brine shrimp. Animals from all experimental groups were raised with the same  
506 number of fish per tank, in tanks of the same size throughout the experiment. Confocal  
507 imaging was performed using a Leica SP5 intravital imaging setup with a 20x/1.0 NA water-  
508 dipping lens. Imaging of *mpeg1*-GFP was performed using the 488 nm laser. Analysis of  
509 imaging data was performed using imageJ (FIJI) and LAS AF software (Leica).

510

#### 511 **Immunofluorescence staining**

512 Immunohistochemistry was performed as described (van Ham et al., 2014; van Ham et al.,  
513 2012). Briefly, larvae were fixed in 4 % PFA at 4°C overnight. Subsequently, they were  
514 dehydrated with an increasing methanol concentration methanol series, stored in 100%  
515 methanol at -20°C for at least 12 hours, and rehydrated, followed by incubation in 150 mM  
516 Tris-HCl (pH=9.0) for 15 minutes at 70°C. Samples were then washed in PBS containing  
517 0.04% Triton (PBST) and incubated in acetone for 20 minutes at -20°C. After washing in  
518 PBST and ddH<sub>2</sub>O, larvae were incubated for three hours in blocking buffer (10 % goat serum,  
519 1 % Triton X-100 (Tx100), 1% BSA, 0.1 % Tween-20 in PBS) at 4°C, followed by incubation  
520 in primary antibody buffer at 4°C for three days. Larvae were washed in 10 % goat serum 1  
521 % Tx100 in PBS and PBS containing 1 % TX100 for a few hours, followed by incubation in

522 secondary antibody buffer at 4°C for 2.5 days. Hereafter the secondary antibody was washed  
523 away using PBS. Primary antibody buffer: 1 % goat serum, 0.8 % Tx100, 1 % BSA, 0.1 %  
524 Tween-20 in PBS. Secondary antibody buffer: 0.8 % goat serum, 1 % BSA and PBS  
525 containing Hoechst. Primary antibodies: PCNA (1:250, Dako), L-plastin (1:500, gift from Yi  
526 Feng, University of Edinburgh). Secondary antibodies used were DyLight Alexa 488 (1:250)  
527 and DyLight Alexa 647 (1:250). Samples were imaged as described above.

528

### 529 **Immunostaining of fish scales**

530 Scales were manually detached from anesthetized fish and pre-treated with 100mM DTT  
531 (Invitrogen) before O/N fixation in 4 % PFA. Immunostaining on floating scales was  
532 performed as described, using the following primary and secondary antibodies: chicken anti-  
533 GFP polyclonal antibody (1:500; Abcam), rabbit anti-DsRed polyclonal antibody (1:500;  
534 Clontech), Alexa Fluor 488-conjugated anti-chicken IgG antibody (1:500; Invitrogen), Alexa  
535 Fluor 594-conjugated anti-rabbit IgG (1:500; Abcam). Images were taken with a Zeiss LSM  
536 780 inverted microscope, using a Plan Apochromat 20x objective. Image post-processing  
537 (contrast and gamma adjust) were performed with the Zeiss Zen Software.

538

### 539 **EdU pulse-chase protocol**

540 Larvae of 4 dpf were placed in a 24 wells plate in HEPES buffered (pH = 7.3) E3 containing  
541 0.003% PTU and 0.5 mM EdU for 24 hours. Next, larvae were fixed in 4% PFA for 3 hours at  
542 room temperature, dehydrated with a 25%, 50%, 75%, 100% MeOH series and stored at -  
543 20°C for at least 12 hours. Rehydrated in series followed by a proteinase K (10 µg/ml in  
544 PBS) incubation for an hour. Followed by 15 minute post fixation in 4% PFA. Larvae were  
545 further permeabilized in 1% DMSO in PBS-T. Thereafter 50µl Click-iT™ (Invitrogen) reaction  
546 cocktail was added for 3 hours at room temperature protected from light. After washing steps  
547 larvae were subjected to immunolabelling using L-plastin (see section immunofluorescent  
548 labelling). Samples were imaged as described above.

549

### 550 **Quantification of live-imaging data and stainings**

551 The number of cells was manually quantified using ImageJ (FIJI) or Leica LASX software. To  
552 generate an overview of the gross migratory patterns maximum intensity projections of  
553 timelapse recordings were generated in FIJI.

554

### 555 **Isolation of *mpeg1*-GFP+ cells from zebrafish larvae and adult fish**

556 At 28 hpf, 35 larvae were collected in 0.16 % MS-222 solution to euthanize them before  
557 adding 5x Trypsin-EDTA (0.25% Trypsin, 0.1 % EDTA in PBS). For *csf1<sup>DM</sup>* cells, at 50 hpf,  
558 70 larvae were used as these mutants had fewer *mpeg1*-GFP positive cells. Micro centrifuge

559 tubes containing zebrafish embryos were incubated on ice on a shaking platform to  
560 dissociate the cells. At 33 dpf and 1.5 mpf, single fish were euthanized in ice water, imaged  
561 to measure their length, and they were cut in small pieces with a razor blade and incubated  
562 in 5x Trypsin-EDTA on ice for 1 hour to dissociate. Next, the cell suspension was transferred  
563 to FACS tubes by running it over a 35  $\mu$ m cell strainer cap. PBS containing 10 % fetal calf  
564 serum (FCS) was added over the strainer caps and the samples were centrifuged for 10  
565 minutes 1000 rpm at 4°C. The pellet was taken up in 300  $\mu$ l PBS-10% FCS containing DAPI  
566 (1:1000). After analysis based on myeloid scatter, singlets, dapi and *mpeg1*-GFP signal cells  
567 were FAC-sorted by FACSAria IIIu and collected in Trizol, followed by RNA isolation  
568 according to the manufacturer's instructions (SMART-Seq® v4 Ultra® Low Input RNA Kit for  
569 Sequencing, Takara Bio USA) (Figure 2A, S4). Single-cell suspensions of dissected adult  
570 zebrafish organs were prepared as previously described (Wittamer et al., 2011). Flow  
571 cytometry and cell sorting were performed with a FACS ARIA II (Becton Dickinson). For  
572 RNA-sequencing, *mpeg1*-GFP-positive cells from the skin were collected in Qiazol and RNA  
573 was extracted using the miRNeasy Micro Kit (Qiagen). Analyses were performed using the  
574 FlowJo software (Treestar).

575

#### 576 **RNA sequencing**

577 cDNA was synthesized and amplified using SMART-seq® V4 Ultra® Low Input RNA kit for  
578 Sequencing (Takara Bio USA, Inc.) following the manufacturer's protocol. Amplified cDNA  
579 was further processed according to TruSeq Sample Preparation v.2 Guide (Illumina) and  
580 paired end-sequenced (2x75 bp) on the HiSeq 2500 (Illumina). Experiment 1, embryonic  
581 macrophages were sequenced at between 12 and 21 million reads per sample. Experiment  
582 2, juvenile macrophages, were sequenced at between 5 and 106 million reads per sample.  
583 Reads were mapped using Star v2.5 against the GRCz10 zebrafish genome (Dobin et al.,  
584 2013). For differential gene expression analysis and GSEA we used the Bioconductor  
585 packages edgeR and GAGE, respectively (Durinck et al., 2009; Luo et al., 2009; Robinson et  
586 al., 2010).

587 For analyses on adult skin *mpeg1*+ cells, RNA quality was checked using a  
588 Bioanalyzer 2100 (Agilent technologies). Indexed cDNA libraries were obtained using the  
589 Ovation Solo RNA-Seq System (NuGen-TECAN) with the SoLo Custom AnyDeplete Probe  
590 Mix (Zebrafish probe set) following manufacturer recommendation. The multiplexed libraries  
591 were loaded on a NovaSeq 6000 (Illumina) using a S2 flow cell and sequences were  
592 produced using a 200 Cycle Kit. On average 65 million paired-end reads were mapped  
593 against the Danio rerio reference genome GRCz11.94 using STAR software to generate  
594 read alignments for each sample. Annotations Danio\_rerio.GRCz11.94.gtf were obtained  
595 from ftp.Ensembl.org. After transcripts assembling, gene level counts were obtained using

596 HTSeq. Genes differentially expressed were identified used the Bioconductor packages  
597 edgeR (Durinck et al., 2009; Robinson et al., 2010).

598

### 599 **qPCR**

600 Relative amount of each transcript was quantified via the  $\Delta Ct$  method, using *MOB family*  
601 *member 4 (mob4)* or *elongation-Factor-1-alpha (ef1 $\alpha$ )* expression for normalization, or via the  
602  $\Delta\Delta Ct$  method, using *mob4* or *ef1 $\alpha$*  and WKM for normalization. Primers are listed in Table 1.  
603 The number of biological replicates are listed in Table 2.

604

### 605 **Statistical analysis**

606 For statistical analysis GraphPad was used to perform Student's *t*-tests, one-way ANOVA  
607 with Dunnett's multiple comparison test, linear regression and non-linear regression analysis.

608 Results were regarded significant at  $p < 0.05$ .

609

### 610 **Acknowledgements**

611 We acknowledge Remco Hoogenboezem, Frederick Libert and Anne Lefort for assistance in  
612 RNA sequencing analysis and Michael Vermeulen for assistance with FACS. We thank  
613 Leslie Sanderson and Stefan Barakat for helpful comments on the manuscript, and the  
614 optical imaging center (OIC) of the Erasmus MC for assistance in confocal microscopy.  
615 Research in the van Ham laboratory is supported by a Marie Curie Career Integration Grant,  
616 a ZonMW VENI grant and an Erasmus University Rotterdam fellowship. Work in the  
617 Wittamer lab is funded by the WELBIO, the Fonds de la Recherche Scientifique FNRS under  
618 Incentive Grant for Scientific Research and The Minerve Foundation. GF is a FNRS  
619 Research Fellow. The work in Petr Bartunek lab was funded by the Czech Science  
620 Foundation, grant number 18-18363S.

621

622 **Table 1. List of primers used for qPCR experiments**

| Gene                          | Forward Primer           | Reverse Primer          |
|-------------------------------|--------------------------|-------------------------|
| <i>ef1<math>\alpha</math></i> | GAGAAGTTCGAGAAGGAAGC     | CGTAGTATTTGCTGGTCTCG    |
| <i>mob4</i>                   | CACCCGTTTCGTGATGAAGTACAA | GTTAAGCAGGATTTACAATGGAG |
| <i>csf1a</i>                  | ACGTCTGTGGACTGGAAGTCTG   | CTGTTGGACAAATGCAGGGG    |
| <i>csf1b</i>                  | GGATTTGGGTTCGGTTCGCTT    | TGGAGAGGGGAACACACAGT    |
| <i>il34</i>                   | AGGGAGTTTCCGACGCTTTT     | CTGAGAAGCCAGCATTTCGGA   |

623

624 **Table 2. Number of biological replicates per group for qPCR**

| Age    | <i>csf1a</i> | <i>csf1b</i> | <i>il34</i> |
|--------|--------------|--------------|-------------|
| 20 hpf | 3            | 1            |             |
| 24 hpf | 5            | 2            | 1           |

|              |   |   |   |
|--------------|---|---|---|
| 36 hpf       | 5 | 5 | 4 |
| 48 hpf       | 3 | 4 | 2 |
| 72 hpf       | 4 | 4 | 3 |
| 7 dpf        | 5 | 4 | 5 |
| 10 dpf       | 4 | 4 | 4 |
| 14 dpf       | 3 | 3 | 2 |
| <b>Organ</b> |   |   |   |
| Gills        | 3 | 3 | 3 |
| Skin         | 3 | 4 | 3 |
| Muscle       | 4 | 3 | 2 |
| Kidney       | 4 | 4 | 2 |
| Heart        | 5 | 2 | 4 |
| Spleen       | 3 | 2 | 2 |
| Eye          | 5 | 5 | 3 |
| Brain        | 6 | 6 | 5 |
| Liver        | 4 | 2 | 5 |
| Intestine    | 3 | 1 | 3 |

625

## 626 **Figure legends**

627

628 **Figure 1 *mpeg1*+ primitive macrophages on the yolk (primitive macrophages) in**  
629 **control and *csf1<sup>DM</sup>* larvae**

630 **A** Representative images of *mpeg1*+ macrophages located on the yolk (29 hpf) and  
631 quantification of *mpeg1*+ cell numbers over time. **B** Representative images of *mpeg1*+  
632 positive primitive macrophages at 52 hpf. The dotted line indicates the border between the  
633 yolk (I) and the embryonic tissue (II). Quantification of *mpeg1*+ macrophages that colonized  
634 the tissue (II) and primitive macrophages located on the yolk (I). **C** Representative maximum  
635 projection of long term time lapse imaging of control and *csf1<sup>DM</sup>* larvae showing migratory  
636 trajectories of *mpeg1*+ macrophages. **D** Snap shots from dividing *mpeg1*+ primitive  
637 macrophages in control and *csf1<sup>DM</sup>* larvae (~36 hpf) and quantification of proliferative  
638 primitive macrophages during 16 hour time lapse imaging (~32 hpf – 48 hpf) (control n = 5,  
639 *csf1<sup>DM</sup>* n = 3). **E** Quantification of fraction proliferative embryonic macrophages during 16  
640 hour time lapse imaging (~56 hpf – 72 hpf) in control and *csf1<sup>DM</sup>* larvae (n = 3 per group).  
641 Scale bars represent 100  $\mu$ M. Error bars represent standard deviation. Statistical significance  
642 is calculated using one-way ANOVA with Dunnett's multiple comparison test or Student's *t*-

643 tests \* < 0.05 \*\* < 0.01 \*\*\* < 0.001. *mpeg1*+ cells were quantified on one side of the embryo  
644 (right side). Each dot represents one fish.

645

646 **Figure 2 RNA sequencing of primitive macrophages at different developmental stages**  
647 **reveals cell cycle arrest in *csf1r<sup>DM</sup>* macrophages from 2 dpf onward**

648 **A** Schematic representation of the experimental set-up. *mpeg1*+ cells were isolated from  
649 both control and *csf1r<sup>DM</sup>* larvae at 28 hpf and 50 hpf using FACS. These cells were used for  
650 RNA sequencing. **B** PCA analysis shows clustering of triplicates and segregation on  
651 genotype (component 1) and developmental stage (component 2). **C** Heat map showing all  
652 significantly differentially expressed genes (logFC > |1|; FDR < 0.01). **D** Counts per million  
653 (CPM) of 'macrophage signature' genes show high, non-differential expression in all groups  
654 (logFC > |1|; FDR > 0.01). **E** CPM values of 'macrophage signature' genes induced over time  
655 in control and *csf1r<sup>DM</sup>* macrophages (logFC > |1|; FDR < 0.01). **F** Volcano plot showing genes  
656 expression changes between control and *csf1r<sup>DM</sup>* at 28 hpf and 50 hpf respectively. Light  
657 grey: all reads, Black/Green/Orange: Macrophage/myeloid signature genes based on data  
658 from Tang et al., 2017 (Tang et al., 2017); Black: non-differentially expressed between  
659 controls and *csf1r<sup>DM</sup>* macrophages; Green: significantly upregulated in control macrophages;  
660 Orange: significantly upregulated in *csf1r<sup>DM</sup>* macrophages (logFC > |1|; FDR < 0.01). 4 and  
661 5% of the macrophage genes were significantly differentially expressed between control and  
662 *csf1r<sup>DM</sup>* macrophages at 28 and 50 hpf respectively.

663

664 **Figure 3. *Csf1r*-deficient tissue resident macrophage (microglia) fail to proliferate**

665 **A** Bar graph showing the GO terms associated with enriched genes downregulated in *csf1r<sup>DM</sup>*  
666 macrophages (P < 0,05). **B** Cartoon representing the vertebrate DNA replication complex, all  
667 components were significantly downregulated in *csf1r<sup>DM</sup>* macrophages. **C** Representative  
668 images and quantification of L-plastin/Edu double positive microglia at 5 dpf. Scale bar  
669 represents 25  $\mu$ M. **D** Representative images of *mpeg1*+ macrophages in the anterior part of  
670 5, 7 and 9 day old zebrafish and quantification of total number of macrophages at the imaged  
671 half of the total embryo and quantification. *Mpeg1*+ cells were quantified on one side of the  
672 embryo (right side). Error bars represent standard deviation. Statistical significance is  
673 calculated using one-way ANOVA with Dunnett's multiple comparison test \* < 0,05 \*\* < 0,01  
674 \*\*\* < 0,001. Each dot represents one fish.

675

676 **Figure 4. Two morphologically distinct populations of *mpeg1*+ cells in emerge from 15**  
677 **dpf in the zebrafish skin**

678 **A** Representative images of a control and *csf1r<sup>DM</sup>* zebrafish at 20 dpf. Dotted line represents  
679 the outline of the fish and its eye. **B** Quantification of the total number of *mpeg1*+ cells at one

680 unilateral side of the fish at different time points between 8 and 24 dpf. The number of  
681 *mpeg1+* cells was manually counted from the unilateral side presented in panel **A**. Plot  
682 showing the relationship between number of *mpeg1+* cells and fish size. Each dot represents  
683 one fish. **C** Representative images of *mpeg1+* cells in different body regions at 22 dpf  
684 showing differences in morphology between controls and *csf1r<sup>DM</sup>* or *il34<sup>-/-</sup>* *mpeg1+* cells (n =  
685 3 per group). Error bars represent standard deviation. *Mpeg1+* cells were quantified on one  
686 side of the embryo (right side).

687

688 **Figure 5. Amoeboid *mpeg1+* cells in the zebrafish skin are of non-hematopoietic origin**  
689 **and have a metaphocyte transcriptome**

690 **A** Immunofluorescence on manually dissected scales from adult skin of control and *csf1r<sup>DM</sup>*  
691 *mpeg1:EGFP +; kdrl*-induced-DsRed+ adults (4 mpf). Stars: single-positive (SP) cells; white  
692 arrowheads: double-positive (DP) cells. **B** FACS analysis on cells from the adult skin (4 mpf,  
693 n=3 per group) and quantification. GFP<sup>+</sup>DsRed<sup>-</sup> = *mpeg1+* only, GFP<sup>+</sup>DsRed<sup>+</sup> =  
694 *mpeg1+/kdrl*-induced-DsRed+. **C** PCA analysis showing segregation based on cell type (PC1)  
695 and genotype (PC2). **D** Volcano plot showing gene expression changes between control  
696 GFP<sup>+</sup>DsRed<sup>+</sup> versus GFP<sup>+</sup>DsRed<sup>-</sup> cells. Light grey: DGE of all genes, Green: DGE of genes  
697 enriched in metaphocytes logFC > 2 (Lin et al., 2019); Orange: DGE of genes downregulated  
698 in metaphocytes logFC < 2 (Lin et al., 2019). **E** Heat map showing the expression of  
699 metaphocyte signature genes. **F** Heat map showing the expression of phagocytosis and  
700 engulfment genes. **G** Venn diagram showing DGE between the three groups (logFC > |2|;  
701 FDR < 0.05).

702

703 **Figure 6. RNA sequencing of juvenile *mpeg1+* cells and FACS analysis of brain, liver**  
704 **and gut, shows systemic depletion of macrophages in *csf1r<sup>DM</sup>* zebrafish**

705 **A** Schematic representation of the RNA sequencing strategy. **B** PCA analysis shows clustering of  
706 triplicates and segregation on genotype (control/*il34<sup>-/-</sup>* vs. *csf1r<sup>DM</sup>*). **C** Heat map showing the  
707 expression of metaphocyte signature genes in control, *il34<sup>-/-</sup>* and *csf1r<sup>DM</sup>* *mpeg1+* cells. **D**  
708 Volcano plot showing gene expression changes between control and *csf1r<sup>DM</sup>* at 1.5 mpf.  
709 Light grey: DGE of all genes, Green: DGE of some phagocytosis genes downregulated in  
710 *csf1r<sup>DM</sup>* *mpeg1+* cells; Orange: DGE of genes enriched in metaphocytes (Lin et al., 2019). **E**  
711 Heat map showing phagocytosis and engulfment genes. **F-H** FACS analysis on cells from  
712 the adult (4 mpf) brain (**F**), liver (**G**) and gut (**H**) and quantifications. GFP<sup>+</sup>DsRed<sup>-</sup> = *mpeg1+*  
713 only, GFP<sup>+</sup>DsRed<sup>+</sup> = *mpeg1+/kdrl*-induced-DsRed+.

714

715 **Figure 7. Schematic presentation of macrophage development in control and *csf1r-***  
716 **deficient zebrafish.** Upper panels indicate development of macrophages, microglia and

717 definitive macrophages and metaphocytes: embryonic macrophages (left), microglia in larval  
718 brain (middle) and macrophages and metaphocytes in larva > 15 dpf. Lower panels indicate  
719 abnormalities found in macrophage development in *csf1r*-deficient zebrafish: embryonic  
720 macrophages fail to migrate across the embryo (left), fewer macrophages arrive in the brain,  
721 and fail to divide (middle), metaphocytes develop normally whereas macrophages are  
722 depleted from larval to adult stages.  
723  
724  
725



726 **Supplemental material**

727 **Figure 1 – figure supplement 1. *Mpeg1+* cells can be detected in the tail region of**  
728 **control and *csf1r<sup>DM</sup>* larvae**

729 **A** Representative images of *mpeg1+* myeloid progenitors located in the tail region at 32 hpf  
730 and quantification. **B** Representative images of *mpeg1+* myeloid progenitors located in the  
731 tail region at 50 hpf and quantification. Scale bars represent 100  $\mu$ m. Error bars represent  
732 standard deviation. Statistical significance is calculated using Student's *t*-tests \*\*\* < 0,001.  
733 *Mpeg1+* cells were quantified on one side of the embryo (right side). Each dot represents  
734 one fish.

735

736 **Figure 2 – figure supplement 1. Macrophage gene expression is not different between**  
737 **controls and *csf1r<sup>DM</sup>* larvae.**

738 **A** Normalized CPM values of genes involved in DNA replication/cell cycle. **B** Representative  
739 images of L-plastin immunohistochemistry of microglia in different *csf1r<sup>DM</sup>* larvae at 4 dpf in  
740 the midbrain. Scale bar represents 20  $\mu$ m. Quantification of L-plastin+ microglia in control  
741 and different *csf1r* mutants at 2, 3 and 4 dpf and quantification Pcn+L-plastin double  
742 positive microglia at 2, 3 and 4 dpf. **C** qPCR analysis on 10-15 whole embryos/larvae per  
743 group at different developmental timepoints, the number of replicates are depicted in table 2.  
744 **D** qPCR analysis on different organs isolated from adult zebrafish (3-5 organs/sample), the  
745 number of replicates are depicted in table 2. Statistical significance is calculated using one-  
746 way ANOVA with Dunnett's multiple comparison test \* < 0,05 \*\* < 0,01 \*\*\* < 0,001. Each dot  
747 represents one fish.

748

749 **Figure 4 – figure supplement 1. Abnormal morphology of *csf1r<sup>DM</sup>* and *il34<sup>-/-</sup>*, but not**  
750 ***csf1a<sup>-/-</sup>b<sup>-/-</sup>* larval *mpeg1+* cells in the skin**

751 **A** Representative images of a control, *csf1r<sup>DM</sup>* and *il34<sup>-/-</sup>* fish at 22 dpf. Dotted line represents  
752 the outline of the fish and its eye. **B** Representative images of *mpeg1+* cells in the skin of  
753 *csf1a<sup>-/-</sup>b<sup>-/-</sup>* showing no differences in morphology between control and *csf1a<sup>-/-</sup>b<sup>-/-</sup>* *mpeg1+* cells  
754 at 15 dpf (n = 3 per group). Error bars represent standard deviation.

755

756 **Figure 5 – figure supplement 1. Gating strategy for isolating *mpeg1+* cells from**  
757 **juveniles**

758 **A** FACS sorting strategy showing one representative example for each genotype. **B**  
759 Quantification of the length of the fish and the percentage *mpeg1+* cells out of live cells \*\*\* <  
760 0,001. Each dot represents one fish.

761

762 **Figure 5 – figure supplement 2. Expression profiles of non-hematopoietic and**  
763 **hematopoietic *mpeg1*+ cells of control and *csf1r<sup>DM</sup>* juvenile zebrafish**

764 **A** Graphs showing counts per million (cpm) values for various genes enriched in  
765 macrophages. **B** Heat map showing the expression of genes downregulated in metaphocytes  
766 compared to neutrophils and LCs (LogFC < 2, Lin et al., 2019).

767

768 **Video S1. Time-lapse recording of primitive macrophages on the yolk from 32 to 48**  
769 **hpf showing frequent proliferative events in both control and *csf1r<sup>DM</sup>* embryos.**

770

771 **Video S2. Time-lapse recording from 56 to 72 hpf, showing the colonization of the**  
772 **embryo by macrophages in control and the migration defect observed in *csf1r<sup>DM</sup>***  
773 **embryos.**

774

775 **Video S3. 3-hour time-lapse recordings of macrophages in the skin showing branched,**  
776 **mesenchymal and non-branched, amoeboid macrophages in control fish and only**  
777 **non-branched, amoeboid macrophages in *csf1r<sup>DM</sup>* fish.**

778

779

780 **References**

- 781 **Aleman, A., Florescu, M., Baron, C. S., Peterson-Maduro, J. and van Oudenaarden,**  
782 **A.** (2018). Whole-organism clone tracing using single-cell sequencing. *Nature*  
783 **556**, 108-112.
- 784 **Barros-Becker, F., Lam, P. Y., Fisher, R. and Huttenlocher, A.** (2017). Live imaging  
785 reveals distinct modes of neutrophil and macrophage migration within  
786 interstitial tissues. *J Cell Sci* **130**, 3801-3808.
- 787 **Bartelmez, S. H. and Stanley, E. R.** (1985). Synergism between hemopoietic growth  
788 factors (HGFs) detected by their effects on cells bearing receptors for a lineage  
789 specific HGF: assay of hemopoietin-1. *J Cell Physiol* **122**, 370-378.
- 790 **Bennett, M. L. and Bennett, F. C.** (2019). The influence of environment and origin on  
791 brain resident macrophages and implications for therapy. *Nature Neuroscience*.
- 792 **Bertrand, J. Y., Chi, N. C., Santoso, B., Teng, S., Stainier, D. Y. and Traver, D.** (2010a).  
793 Haematopoietic stem cells derive directly from aortic endothelium during  
794 development. *Nature* **464**, 108-111.
- 795 **Bertrand, J. Y., Chi, N. C., Santoso, B., Teng, S. T., Stainier, D. Y. R. and Traver, D.**  
796 (2010b). Haematopoietic stem cells derive directly from aortic endothelium  
797 during development. *Nature* **464**, 108-U120.
- 798 **Boisset, J. C., van Cappellen, W., Andrieu-Soler, C., Galjart, N., Dzierzak, E. and**  
799 **Robin, C.** (2010). In vivo imaging of haematopoietic cells emerging from the  
800 mouse aortic endothelium. *Nature* **464**, 116-120.
- 801 **Caetano-Lopes, J., Henke, K., Urso, K., Duryea, J., Charles, J. F., Warman, M. L. and**  
802 **Harris, M. P.** (2020). Unique and non-redundant function of csf1r paralogues in  
803 regulation and evolution of post-embryonic development of the zebrafish.  
804 *Development* **147**.
- 805 **Cassetta, L. and Pollard, J. W.** (2018). Targeting macrophages: therapeutic approaches  
806 in cancer. *Nat Rev Drug Discov* **17**, 887-904.
- 807 **Cecchini, M. G., Dominguez, M. G., Mocci, S., Wetterwald, A., Felix, R., Fleisch, H.,**  
808 **Chisholm, O., Hofstetter, W., Pollard, J. W. and Stanley, E. R.** (1994). Role of  
809 colony stimulating factor-1 in the establishment and regulation of tissue  
810 macrophages during postnatal development of the mouse. *Development* **120**,  
811 1357-1372.
- 812 **Chatani, M., Takano, Y. and Kudo, A.** (2011). Osteoclasts in bone modeling, as revealed  
813 by in vivo imaging, are essential for organogenesis in fish. *Dev Biol* **360**, 96-109.
- 814 **Chopin, M., Seillet, C., Chevrier, S., Wu, L., Wang, H., Morse, H. C., 3rd, Belz, G. T. and**  
815 **Nutt, S. L.** (2013). Langerhans cells are generated by two distinct PU.1-  
816 dependent transcriptional networks. *J Exp Med* **210**, 2967-2980.
- 817 **Dai, X. M., Ryan, G. R., Hapel, A. J., Dominguez, M. G., Russell, R. G., Kapp, S.,**  
818 **Sylvestre, V. and Stanley, E. R.** (2002). Targeted disruption of the mouse colony-  
819 stimulating factor 1 receptor gene results in osteopetrosis, mononuclear  
820 phagocyte deficiency, increased primitive progenitor cell frequencies, and  
821 reproductive defects. *Blood* **99**, 111-120.
- 822 **Dobin, A., Davis, C. A., Schlesinger, F., Drenkow, J., Zaleski, C., Jha, S., Batut, P.,**  
823 **Chaisson, M. and Gingeras, T. R.** (2013). STAR: ultrafast universal RNA-seq  
824 aligner. *Bioinformatics* **29**, 15-21.
- 825 **Durinck, S., Spellman, P. T., Birney, E. and Huber, W.** (2009). Mapping identifiers for  
826 the integration of genomic datasets with the R/Bioconductor package biomaRt.  
827 *Nat Protoc* **4**, 1184-1191.

- 828 **Edwards, D. K. t., Watanabe-Smith, K., Rofelty, A., Damnernsawad, A., Laderas, T.,**  
829 **Lamble, A., Lind, E. F., Kaempf, A., Mori, M., Rosenberg, M., et al.** (2019).  
830 CSF1R inhibitors exhibit antitumor activity in acute myeloid leukemia by  
831 blocking paracrine signals from support cells. *Blood* **133**, 588-599.
- 832 **Ellett, F. and Lieschke, G. J.** (2010). Zebrafish as a model for vertebrate hematopoiesis.  
833 *Curr Opin Pharmacol* **10**, 563-570.
- 834 **Ellett, F., Pase, L., Hayman, J. W., Andrianopoulos, A. and Lieschke, G. J.** (2010).  
835 mpeg1 promoter transgenes direct macrophage-lineage expression in zebrafish.  
836 *Blood* **117**, e49-56.
- 837 **Erblich, B., Zhu, L., Etgen, A. M., Dobrenis, K. and Pollard, J. W.** (2011). Absence of  
838 colony stimulation factor-1 receptor results in loss of microglia, disrupted brain  
839 development and olfactory deficits. *PLoS One* **6**, e26317.
- 840 **Espin-Palazon, R., Stachura, D. L., Campbell, C. A., Garcia-Moreno, D., Del Cid, N.,**  
841 **Kim, A. D., Candel, S., Meseguer, J., Mulero, V. and Traver, D.** (2014).  
842 Proinflammatory signaling regulates hematopoietic stem cell emergence. *Cell*  
843 **159**, 1070-1085.
- 844 **Ferrero, G., Gomez, E., Lyer, S., Rovira, M., Miserocchi, M., Langenau, D. M.,**  
845 **Bertrand, J. Y. and Wittamer, V.** (2020). The macrophage-expressed gene  
846 (mpeg) 1 identifies a subpopulation of B cells in the adult zebrafish. *J Leukoc Biol*  
847 **107**, 431-443.
- 848 **Ferrero, G., Mahony, C. B., Dupuis, E., Yvernogeu, L., Di Ruggiero, E., Miserocchi,**  
849 **M., Caron, M., Robin, C., Traver, D., Bertrand, J. Y., et al.** (2018). Embryonic  
850 Microglia Derive from Primitive Macrophages and Are Replaced by cmyb-  
851 Dependent Definitive Microglia in Zebrafish. *Cell Rep* **24**, 130-141.
- 852 **Ginhoux, F., Greter, M., Leboeuf, M., Nandi, S., See, P., Gokhan, S., Mehler, M. F.,**  
853 **Conway, S. J., Ng, L. G., Stanley, E. R., et al.** (2010). Fate mapping analysis  
854 reveals that adult microglia derive from primitive macrophages. *Science* **330**,  
855 841-845.
- 856 **Gore, A. V., Pillay, L. M., Venero Galanternik, M. and Weinstein, B. M.** (2018). The  
857 zebrafish: A fantastic model for hematopoietic development and disease. *Wiley*  
858 *Interdisciplinary Reviews: Developmental Biology* **7**.
- 859 **Gosselin, D., Link, V. M., Romanoski, C. E., Fonseca, G. J., Eichenfield, D. Z., Spann, N.**  
860 **J., Stender, J. D., Chun, H. B., Garner, H., Geissmann, F., et al.** (2014).  
861 Environment drives selection and function of enhancers controlling tissue-  
862 specific macrophage identities. *Cell* **159**, 1327-1340.
- 863 **Gosselin, D., Skola, D., Coufal, N. G., Holtman, I. R., Schlachetzki, J. C. M., Sajti, E.,**  
864 **Jaeger, B. N., O'Connor, C., Fitzpatrick, C., Pasillas, M. P., et al.** (2017). An  
865 environment-dependent transcriptional network specifies human microglia  
866 identity. *Science* **356**.
- 867 **Greter, M., Lelios, I., Pelczar, P., Hoeffel, G., Price, J., Leboeuf, M., Kundig, T. M., Frei,**  
868 **K., Ginhoux, F., Merad, M., et al.** (2012). Stroma-derived interleukin-34 controls  
869 the development and maintenance of langerhans cells and the maintenance of  
870 microglia. *Immunity* **37**, 1050-1060.
- 871 **Guilliams, M., Thierry, G. R., Bonnardel, J. and Bajenoff, M.** (2020). Establishment  
872 and Maintenance of the Macrophage Niche. *Immunity* **52**, 434-451.
- 873 **Guo, L., Bertola, D. R., Takanohashi, A., Saito, A., Segawa, Y., Yokota, T., Ishibashi, S.,**  
874 **Nishida, Y., Yamamoto, G. L., Franco, J., et al.** (2019). Bi-allelic CSF1R Mutations  
875 Cause Skeletal Dysplasia of Dysosteosclerosis-Pyle Disease Spectrum and

- 876 Degenerative Encephalopathy with Brain Malformation. *Am J Hum Genet* **104**,  
877 925-935.
- 878 **Hambleton, S., Salem, S., Bustamante, J., Bigley, V., Boisson-Dupuis, S., Azevedo, J.,**  
879 **Fortin, A., Haniffa, M., Ceron-Gutierrez, L., Bacon, C. M., et al.** (2011). IRF8  
880 mutations and human dendritic-cell immunodeficiency. *N Engl J Med* **365**, 127-  
881 138.
- 882 **He, B. L., Shi, X., Man, C. H., Ma, A. C., Ekker, S. C., Chow, H. C., So, C. W., Choi, W. W.,**  
883 **Zhang, W., Zhang, Y., et al.** (2014). Functions of flt3 in zebrafish hematopoiesis  
884 and its relevance to human acute myeloid leukemia. *Blood* **123**, 2518-2529.
- 885 **He, S., Chen, J., Jiang, Y., Wu, Y., Zhu, L., Jin, W., Zhao, C., Yu, T., Wang, T., Wu, S., et al.**  
886 (2018). Adult zebrafish Langerhans cells arise from hematopoietic  
887 stem/progenitor cells. *Elife* **7**.
- 888 **Henninger, J., Santoso, B., Hans, S., Durand, E., Moore, J., Mosimann, C., Brand, M.,**  
889 **Traver, D. and Zon, L.** (2017). Clonal fate mapping quantifies the number of  
890 haematopoietic stem cells that arise during development. *Nat Cell Biol* **19**, 17-27.
- 891 **Herbomel, P., Thisse, B. and Thisse, C.** (1999). Ontogeny and behaviour of early  
892 macrophages in the zebrafish embryo. *Development* **126**, 3735-3745.
- 893 **Herbomel, P., Thisse, B. and Thisse, C.** (2001). Zebrafish early macrophages colonize  
894 cephalic mesenchyme and developing brain, retina, and epidermis through a M-  
895 CSF receptor-dependent invasive process. *Dev Biol* **238**, 274-288.
- 896 **Hume, D. A., Summers, K. M. and Rehli, M.** (2016). Transcriptional Regulation and  
897 Macrophage Differentiation. *Microbiol Spectr* **4**.
- 898 **Kissa, K. and Herbomel, P.** (2010). Blood stem cells emerge from aortic endothelium  
899 by a novel type of cell transition. *Nature* **464**, 112-115.
- 900 **Konno, T., Kasanuki, K., Ikeuchi, T., Dickson, D. W. and Wszolek, Z. K.** (2018a).  
901 CSF1R-related leukoencephalopathy: A major player in primary microgliopathies.  
902 *Neurology* **91**, 1092-1104.
- 903 **Konno, T., Miura, T., Harriott, A. M., Mezaki, N., Edwards, E. S., Rademakers, R.,**  
904 **Ross, O. A., Meschia, J. F., Ikeuchi, T. and Wszolek, Z. K.** (2018b). Partial loss of  
905 function of colony-stimulating factor 1 receptor in a patient with white matter  
906 abnormalities. *Eur J Neurol* **25**, 875-881.
- 907 **Kuil, L. E., Oosterhof, N., Geurts, S. N., van der Linde, H. C., Meijering, E. and van**  
908 **Ham, T. J.** (2018). Reverse genetic screen reveals that Il34 facilitates yolk sac  
909 macrophage distribution and seeding of the brain. *bioRxiv*.
- 910 **Kuil, L. E., Oosterhof, N., Geurts, S. N., van der Linde, H. C., Meijering, E. and van**  
911 **Ham, T. J.** (2019). Reverse genetic screen reveals that Il34 facilitates yolk sac  
912 macrophage distribution and seeding of the brain. *Dis Model Mech* **12**.
- 913 **Lavin, Y., Winter, D., Blecher-Gonen, R., David, E., Keren-Shaul, H., Merad, M., Jung,**  
914 **S. and Amit, I.** (2014). Tissue-resident macrophage enhancer landscapes are  
915 shaped by the local microenvironment. *Cell* **159**, 1312-1326.
- 916 **Levraud, J. P. and Herbomel, P.** (2019). Resident Macrophage Lookalikes of  
917 Unexpected Origin. *Developmental Cell* **49**, 501-502.
- 918 **Lin, X., Zhou, Q., Zhao, C., Lin, G., Xu, J. and Wen, Z.** (2019). An Ectoderm-Derived  
919 Myeloid-like Cell Population Functions as Antigen Transporters for Langerhans  
920 Cells in Zebrafish Epidermis. *Dev Cell* **49**, 605-617 e605.
- 921 **Liu, Z., Gu, Y., Chakarov, S., Bleriot, C., Kwok, I., Chen, X., Shin, A., Huang, W., Dress,**  
922 **R. J., Dutertre, C. A., et al.** (2019). Fate Mapping via Ms4a3-Expression History  
923 Traces Monocyte-Derived Cells. *Cell* **178**, 1509-1525 e1519.

- 924 **Lloyd, A. F., Davies, C. L., Holloway, R. K., Labrak, Y., Ireland, G., Carradori, D.,**  
925 **Dillenburg, A., Borger, E., Soong, D., Richardson, J. C., et al. (2019).** Central  
926 nervous system regeneration is driven by microglia necroptosis and  
927 repopulation. *Nat Neurosci* **22**, 1046-1052.
- 928 **Lugo-Villarino, G., Balla, K. M., Stachura, D. L., Banuelos, K., Werneck, M. B. and**  
929 **Traver, D. (2010).** Identification of dendritic antigen-presenting cells in the  
930 zebrafish. *Proc Natl Acad Sci U S A* **107**, 15850-15855.
- 931 **Luo, W., Friedman, M. S., Shedden, K., Hankenson, K. D. and Woolf, P. J. (2009).**  
932 GAGE: generally applicable gene set enrichment for pathway analysis. *BMC*  
933 *Bioinformatics* **10**, 161.
- 934 **Madigan, C. A., Cambier, C. J., Kelly-Scumpia, K. M., Scumpia, P. O., Cheng, T. Y.,**  
935 **Zailaa, J., Bloom, B. R., Moody, D. B., Smale, S. T., Sagasti, A., et al. (2017).** A  
936 Macrophage Response to Mycobacterium leprae Phenolic Glycolipid Initiates  
937 Nerve Damage in Leprosy. *Cell* **170**, 973-985 e910.
- 938 **Mahony, C. B., Pasche, C. and Bertrand, J. Y. (2018).** Oncostatin M and Kit-Ligand  
939 Control Hematopoietic Stem Cell Fate during Zebrafish Embryogenesis. *Stem Cell*  
940 *Reports* **10**, 1920-1934.
- 941 **Mass, E., Jacome-Galarza, C. E., Blank, T., Lazarov, T., Durham, B. H., Ozkaya, N.,**  
942 **Pastore, A., Schwabenland, M., Chung, Y. R., Rosenblum, M. K., et al. (2017).** A  
943 somatic mutation in erythro-myeloid progenitors causes neurodegenerative  
944 disease. *Nature* **549**, 389-393.
- 945 **Matcovitch-Natan, O. W., D. R.; Giladi, A.; Vargas Aguilar, S.; Spinrad, A.; Sarrazin, S.;**  
946 **Ben-Yehuda, H.; David, E.; Zelada González, F.; Perrin, P.; Keren-Shaul, H.;**  
947 **Gury, M.; Lara-Astaiso, D.; Thaiss, C. A.; Cohen, M.; Bahar Halpern, K.;**  
948 **Baruch, K.; Deczkowska, A.; Lorenzo-Vivas, E.; Itzkovitz, S.; Elinav, E.;**  
949 **Sieweke, M. H.; Schwartz, M.; Amit, I. (2016).** Microglia development follows a  
950 stepwise program to regulate brain homeostasis. *Science* **353**, 789-795.
- 951 **McGrath, K. E., Frame, J. M. and Palis, J. (2015).** Early hematopoiesis and macrophage  
952 development. *Semin Immunol* **27**, 379-387.
- 953 **Meireles, A. M., Shiau, C. E., Guenther, C. A., Sidik, H., Kingsley, D. M. and Talbot, W.**  
954 **S. (2014).** The Phosphate Exporter xpr1b Is Required for Differentiation of  
955 Tissue-Resident Macrophages. *Cell reports* **8**, 1659-1667.
- 956 **Monies, D., Maddirevula, S., Kurdi, W., Alanazy, M. H., Alkhalidi, H., Al-Owain, M.,**  
957 **Sulaiman, R. A., Faqeih, E., Goljan, E., Ibrahim, N., et al. (2017).** Autozygosity  
958 reveals recessive mutations and novel mechanisms in dominant genes:  
959 implications in variant interpretation. *Genet Med* **19**, 1144-1150.
- 960 **Murayama, E., Kissa, K., Zapata, A., Mordélet, E., Briolat, V., Lin, H. F., Handin, R. I.**  
961 **and Herbomel, P. (2006).** Tracing hematopoietic precursor migration to  
962 successive hematopoietic organs during zebrafish development. *Immunity* **25**,  
963 963-975.
- 964 **Oosterhof, N., Chang, I. J., Karimiani, E. G., Kuil, L. E., Jensen, D. M., Daza, R., Young,**  
965 **E., Astle, L., van der Linde, H. C., Shivaram, G. M., et al. (2019).** Homozygous  
966 Mutations in CSF1R Cause a Pediatric-Onset Leukoencephalopathy and Can  
967 Result in Congenital Absence of Microglia. *Am J Hum Genet.* **104**, 936-947.
- 968 **Oosterhof, N., Kuil, L. E., van der Linde, H. C., Burm, S. M., Berdowski, W., van Ijcken,**  
969 **W. F. J., van Swieten, J. C., Hol, E. M., Verheijen, M. H. G. and van Ham, T. J.**  
970 **(2018).** Colony-Stimulating Factor 1 Receptor (CSF1R) Regulates Microglia  
971 Density and Distribution, but Not Microglia Differentiation In Vivo. *Cell Rep* **24**,  
972 1203-1217 e1206.

- 973 **Parichy, D. M., Elizondo, M. R., Mills, M. G., Gordon, T. N. and Engeszer, R. E.** (2009).  
974 Normal table of postembryonic zebrafish development: staging by externally  
975 visible anatomy of the living fish. *Dev Dyn* **238**, 2975-3015.
- 976 **Patterson, L. B. and Parichy, D. M.** (2013). Interactions with iridophores and the tissue  
977 environment required for patterning melanophores and xanthophores during  
978 zebrafish adult pigment stripe formation. *PLoS Genet* **9**, e1003561.
- 979 **Pridans, C., Raper, A., Davis, G. M., Alves, J., Sauter, K. A., Lefevre, L., Regan, T.,**  
980 **Meek, S., Sutherland, L., Thomson, A. J., et al.** (2018). Pleiotropic Impacts of  
981 Macrophage and Microglial Deficiency on Development in Rats with Targeted  
982 Mutation of the *Csf1r* Locus. *J Immunol* **201**, 2683-2699.
- 983 **Rademakers, R., Baker, M., Nicholson, A. M., Rutherford, N. J., Finch, N., Soto-**  
984 **Ortolaza, A., Lash, J., Wider, C., Wojtas, A., DeJesus-Hernandez, M., et al.**  
985 (2011). Mutations in the colony stimulating factor 1 receptor (CSF1R) gene cause  
986 hereditary diffuse leukoencephalopathy with spheroids. *Nat Genet* **44**, 200-205.
- 987 **Robinson, M. D., McCarthy, D. J. and Smyth, G. K.** (2010). edgeR: a Bioconductor  
988 package for differential expression analysis of digital gene expression data.  
989 *Bioinformatics* **26**, 139-140.
- 990 **Sarrazin, S., Mossadegh-Keller, N., Fukao, T., Aziz, A., Mourcin, F., Vanhille, L., Kelly**  
991 **Modis, L., Kastner, P., Chan, S., Duprez, E., et al.** (2009). MafB restricts M-CSF-  
992 dependent myeloid commitment divisions of hematopoietic stem cells. *Cell* **138**,  
993 300-313.
- 994 **Shemer, A., Grozovski, J., Tay, T. L., Tao, J., Volaski, A., Suss, P., Ardura-Fabregat, A.,**  
995 **Gross-Vered, M., Kim, J. S., David, E., et al.** (2018). Engrafted parenchymal brain  
996 macrophages differ from microglia in transcriptome, chromatin landscape and  
997 response to challenge. *Nat Commun* **9**, 5206.
- 998 **Soucie, E. L., Weng, Z., Geirsdottir, L., Molawi, K., Maurizio, J., Fenouil, R.,**  
999 **Mossadegh-Keller, N., Gimenez, G., VanHille, L., Beniazza, M., et al.** (2016).  
1000 Lineage-specific enhancers activate self-renewal genes in macrophages and  
1001 embryonic stem cells. *Science* **351**, aad5510.
- 1002 **Stremmel, C., Schuchert, R., Wagner, F., Thaler, R., Weinberger, T., Pick, R., Mass, E.,**  
1003 **Ishikawa-Ankerhold, H. C., Margraf, A., Hutter, S., et al.** (2018). Yolk sac  
1004 macrophage progenitors traffic to the embryo during defined stages of  
1005 development. *Nat Commun* **9**, 75.
- 1006 **Tamplin, O. J., Durand, E. M., Carr, L. A., Childs, S. J., Hagedorn, E. J., Li, P., Yzaguirre,**  
1007 **A. D., Speck, N. A. and Zon, L. I.** (2015). Hematopoietic stem cell arrival triggers  
1008 dynamic remodeling of the perivascular niche. *Cell* **160**, 241-252.
- 1009 **Tang, Q., Iyer, S., Lobbardi, R., Moore, J. C., Chen, H., Lareau, C., Hebert, C., Shaw, M.**  
1010 **L., Neftel, C., Suva, M. L., et al.** (2017). Dissecting hematopoietic and renal cell  
1011 heterogeneity in adult zebrafish at single-cell resolution using RNA sequencing. *J*  
1012 *Exp Med* **214**, 2875-2887.
- 1013 **Tap, W. D., Wainberg, Z. A., Anthony, S. P., Ibrahim, P. N., Zhang, C., Healey, J. H.,**  
1014 **Chmielowski, B., Staddon, A. P., Cohn, A. L., Shapiro, G. I., et al.** (2015).  
1015 Structure-Guided Blockade of CSF1R Kinase in Tenosynovial Giant-Cell Tumor. *N*  
1016 *Engl J Med* **373**, 428-437.
- 1017 **Tushinski, R. J. and Stanley, E. R.** (1985). The regulation of mononuclear phagocyte  
1018 entry into S phase by the colony stimulating factor CSF-1. *J Cell Physiol* **122**, 221-  
1019 228.
- 1020 **Tyrkalska, S. D., Pérez-Oliva, A. B., Rodríguez-Ruiz, L., Martínez-Morcillo, F. J.,**  
1021 **Alcaraz-Pérez, F., Martínez-Navarro, F. J., Lachaud, C., Ahmed, N., Schroeder,**

- 1022 **T., Pardo-Sánchez, I., et al.** (2019). Inflammasome Regulates Hematopoiesis  
1023 through Cleavage of the Master Erythroid Transcription Factor GATA1. *Immunity*.  
1024 **van de Laar, L., Saelens, W., De Prijck, S., Martens, L., Scott, C. L., Van Isterdael, G.,**  
1025 **Hoffmann, E., Beyaert, R., Saeys, Y., Lambrecht, B. N., et al.** (2016). Yolk Sac  
1026 Macrophages, Fetal Liver, and Adult Monocytes Can Colonize an Empty Niche and  
1027 Develop into Functional Tissue-Resident Macrophages. *Immunity* **44**, 755-768.  
1028 **van Ham, T. J., Brady, C. A., Kalicharan, R. D., Oosterhof, N., Kuipers, J., Veenstra-**  
1029 **Algra, A., Sjollem, K. A., Peterson, R. T., Kampinga, H. H. and Giepmans, B. N.**  
1030 (2014). Intravital correlated microscopy reveals differential macrophage and  
1031 microglial dynamics during resolution of neuroinflammation. *Dis Model Mech* **7**,  
1032 857-869.  
1033 **van Ham, T. J., Kokel, D. and Peterson, R. T.** (2012). Apoptotic cells are cleared by  
1034 directional migration and elmo1- dependent macrophage engulfment. *Curr Biol*  
1035 **22**, 830-836.  
1036 **Wang, Y., Szretter, K. J., Vermi, W., Gilfillan, S., Rossini, C., Cella, M., Barrow, A. D.,**  
1037 **Diamond, M. S. and Colonna, M.** (2012). IL-34 is a tissue-restricted ligand of  
1038 CSF1R required for the development of Langerhans cells and microglia. *Nat*  
1039 *Immunol* **13**, 753-760.  
1040 **Webb, M. W., Sun, J., Sheard, M. A., Liu, W. Y., Wu, H. W., Jackson, J. R., Malvar, J.,**  
1041 **Spoto, R., Daniel, D. and Seeger, R. C.** (2018). Colony stimulating factor 1  
1042 receptor blockade improves the efficacy of chemotherapy against human  
1043 neuroblastoma in the absence of T lymphocytes. *Int J Cancer* **143**, 1483-1493.  
1044 **Williams, N., Bertonecello, I., Kavnoudias, H., Zsebo, K. and McNiece, I.** (1992).  
1045 Recombinant rat stem cell factor stimulates the amplification and differentiation  
1046 of fractionated mouse stem cell populations. *Blood* **79**, 58-64.  
1047 **Wittamer, V., Bertrand, J. Y., Gutschow, P. W. and Traver, D.** (2011). Characterization  
1048 of the mononuclear phagocyte system in zebrafish. *Blood* **117**, 7126-7135.  
1049 **Wu, S., Xue, R., Hassan, S., Nguyen, T. M. L., Wang, T., Pan, H., Xu, J., Liu, Q., Zhang, W.**  
1050 **and Wen, Z.** (2018). Il34-Csf1r Pathway Regulates the Migration and  
1051 Colonization of Microglial Precursors. *Dev Cell* **46**, 552-563 e554.  
1052 **Xu, J., Wang, T., Wu, Y., Jin, W. and Wen, Z.** (2016). Microglia Colonization of  
1053 Developing Zebrafish Midbrain Is Promoted by Apoptotic Neuron and  
1054 Lysophosphatidylcholine. *Dev Cell* **38**, 214-222.  
1055 **Yang, M., McKay, D., Pollard, J. W. and Lewis, C. E.** (2018). Diverse Functions of  
1056 Macrophages in Different Tumor Microenvironments. *Cancer Res* **78**, 5492-5503.  
1057 **Zarif, J. C., Taichman, R. S. and Pienta, K. J.** (2014). TAM macrophages promote growth  
1058 and metastasis within the cancer ecosystem. *Oncoimmunology* **3**, e941734.  
1059



# Figure 1.

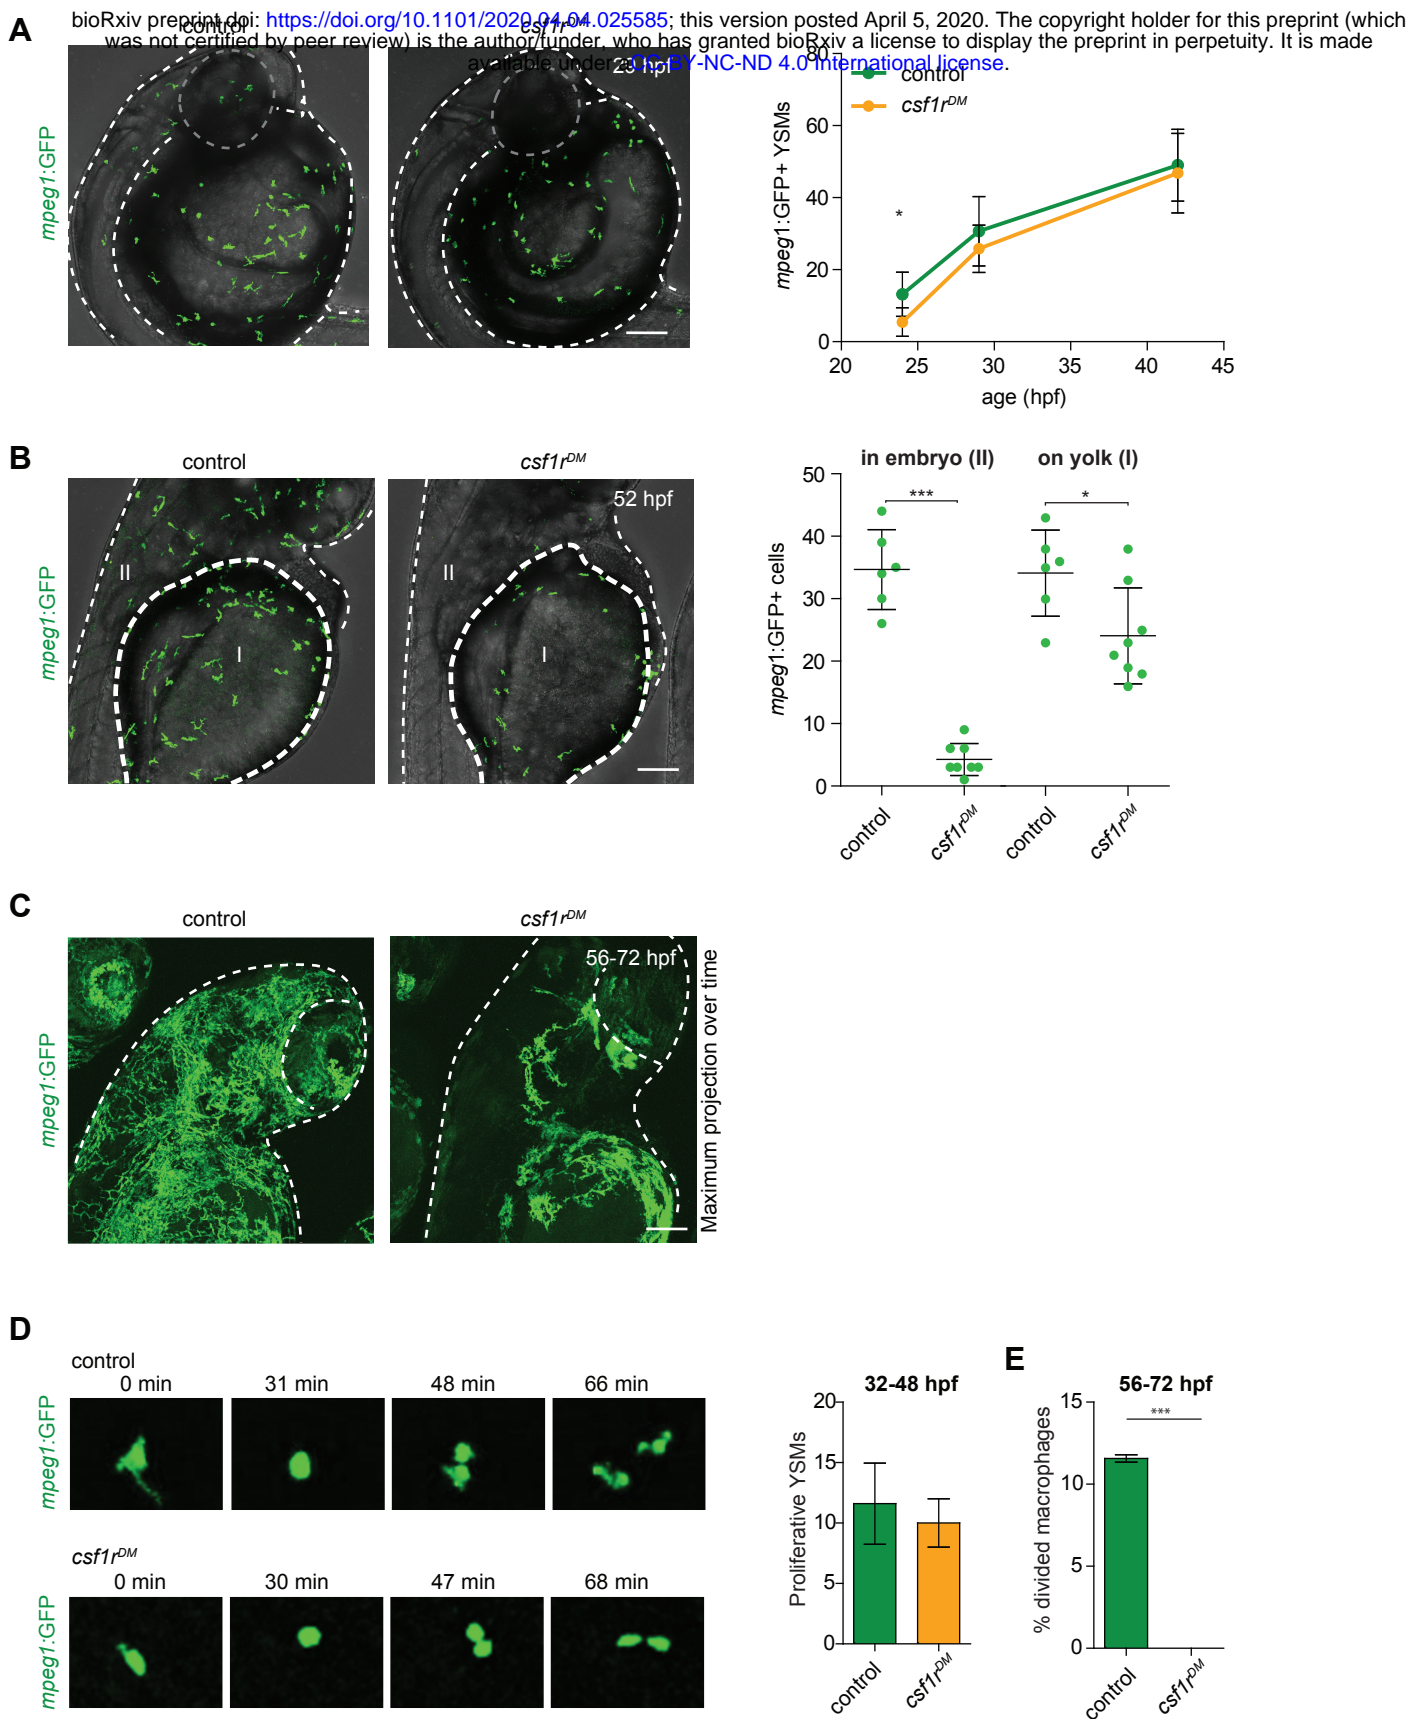

**Figure 2.**

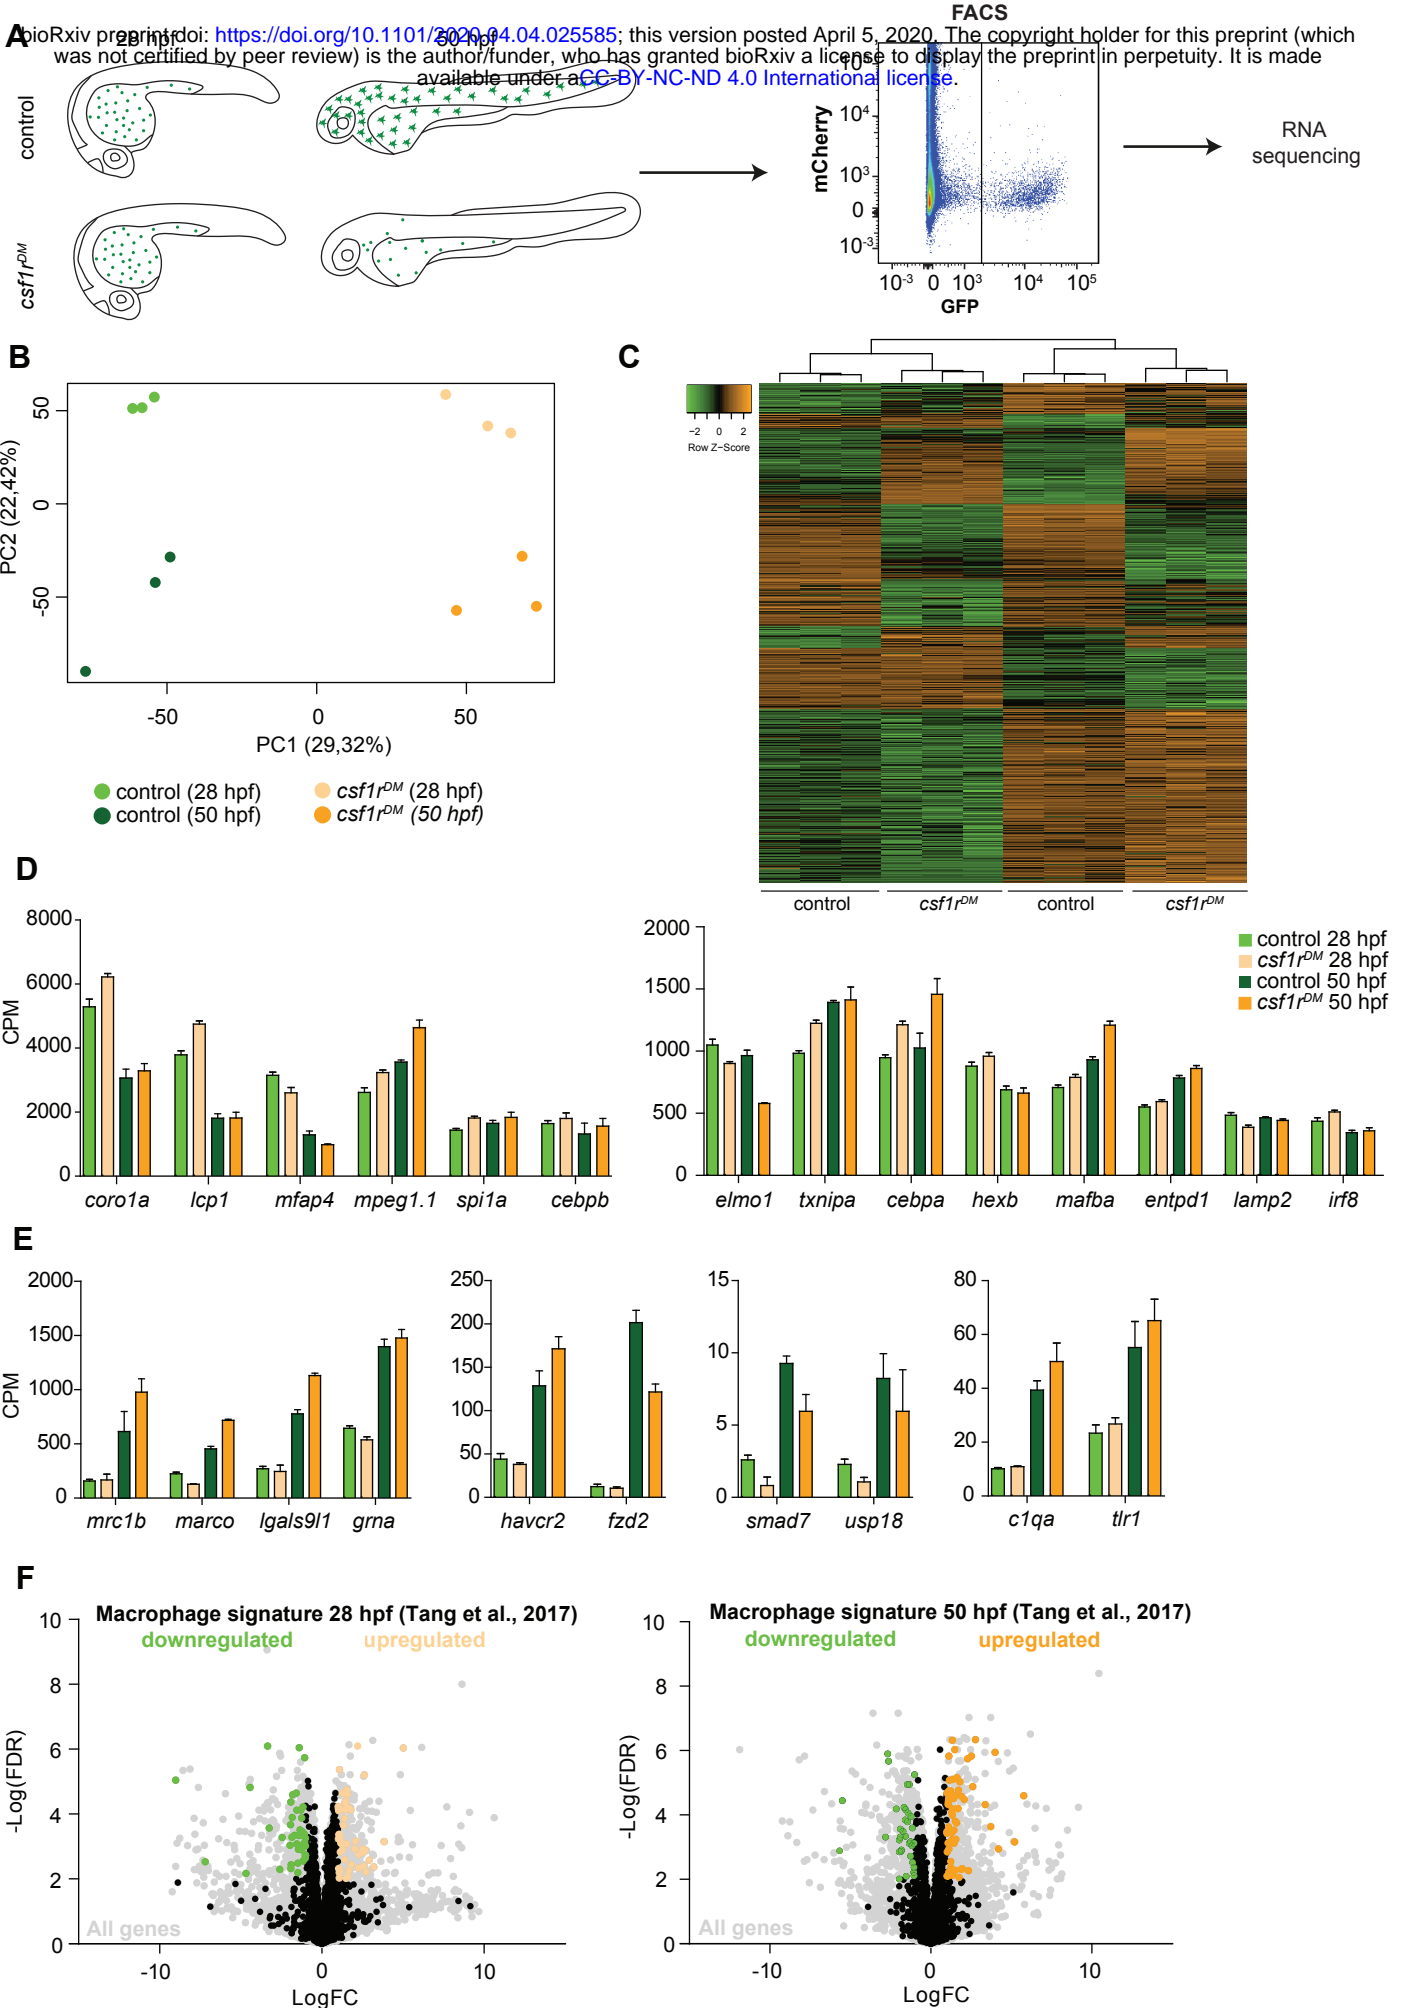

**Figure 3**

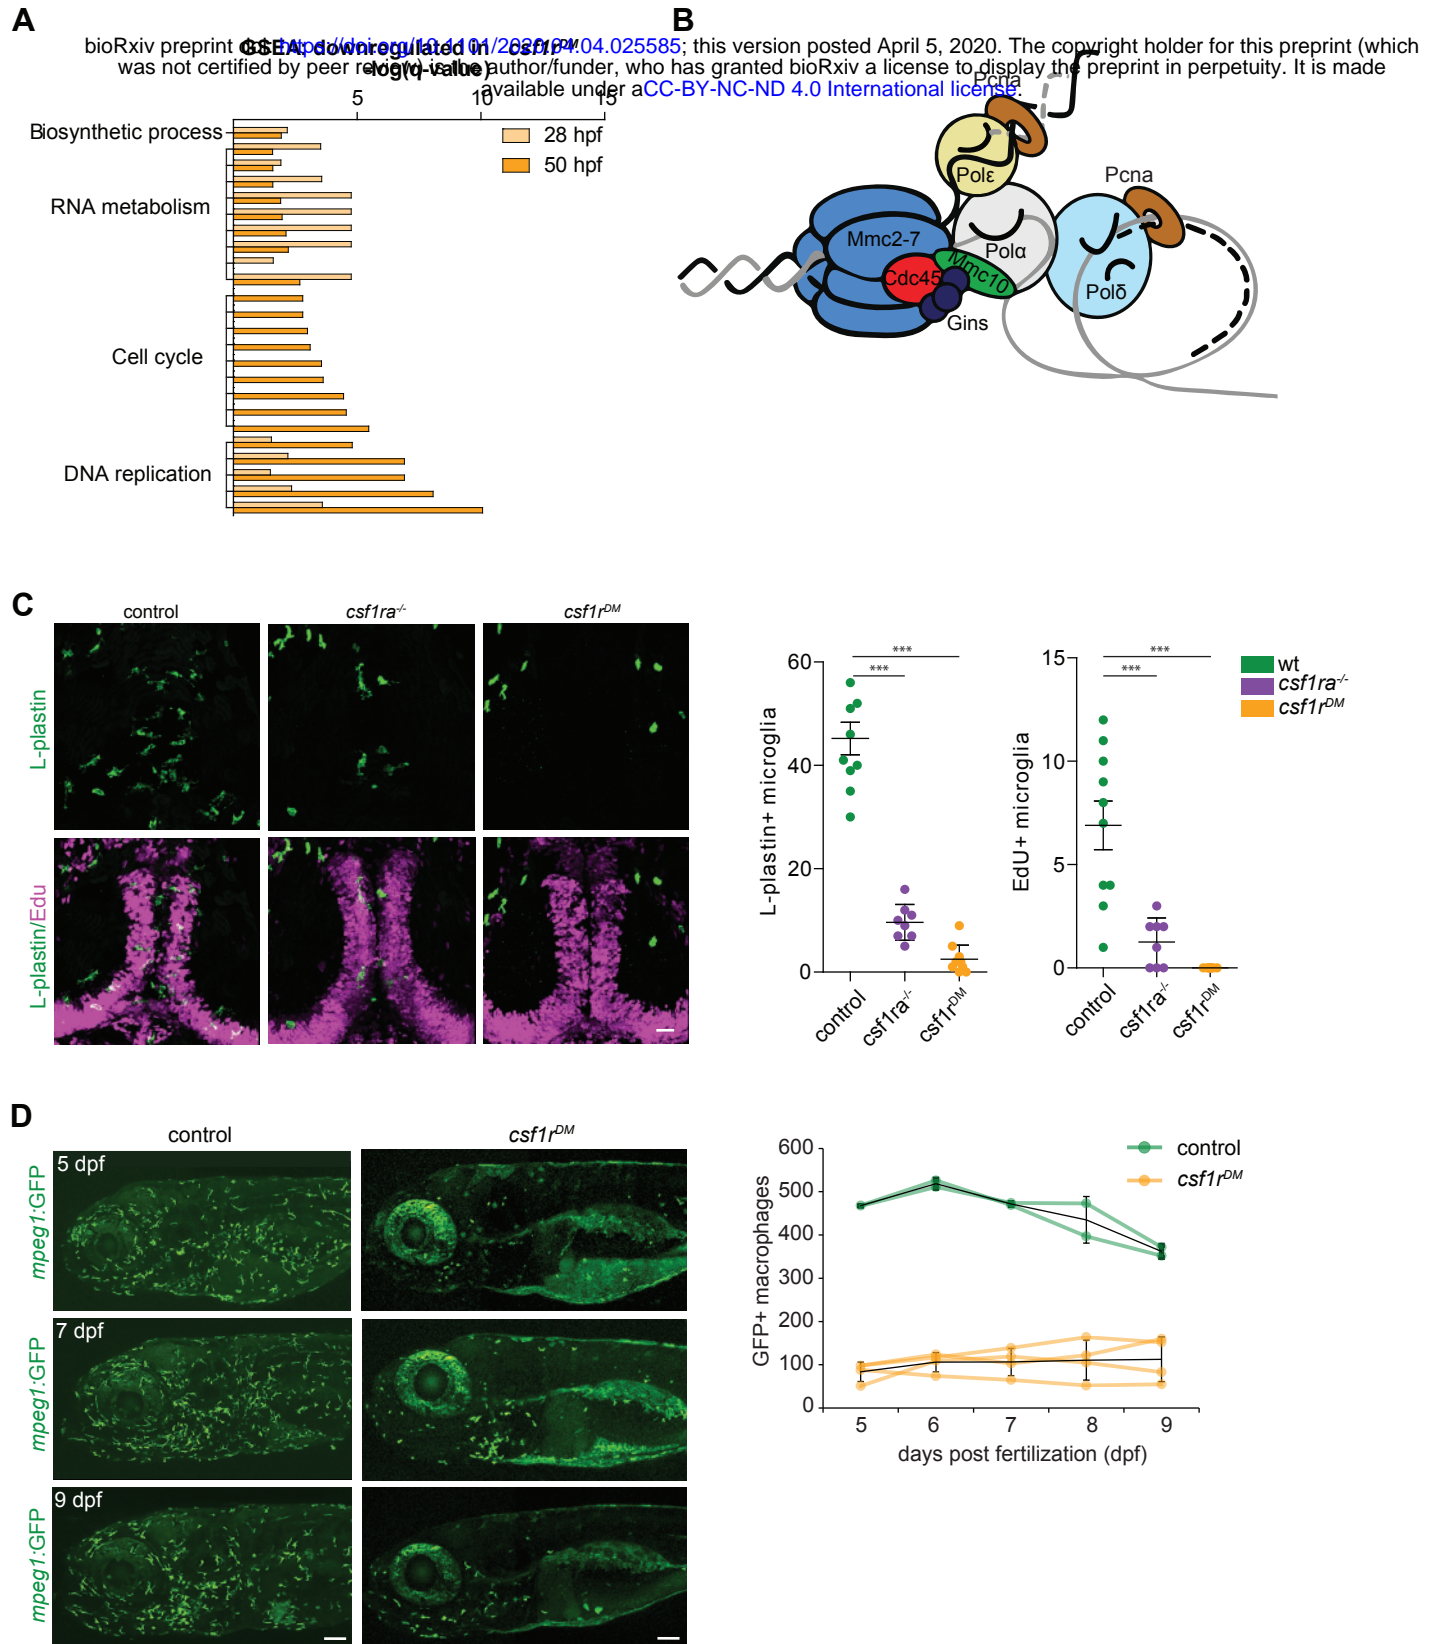

**Figure 4**

**A** bioRxiv preprint doi: <https://doi.org/10.1101/2020.04.04.025585>; this version posted April 5, 2020. The copyright holder for this preprint (which was not certified by peer review) is the author/funder, who has granted bioRxiv a license to display the preprint in perpetuity. It is made available under aCC-BY-NC-ND 4.0 International license.

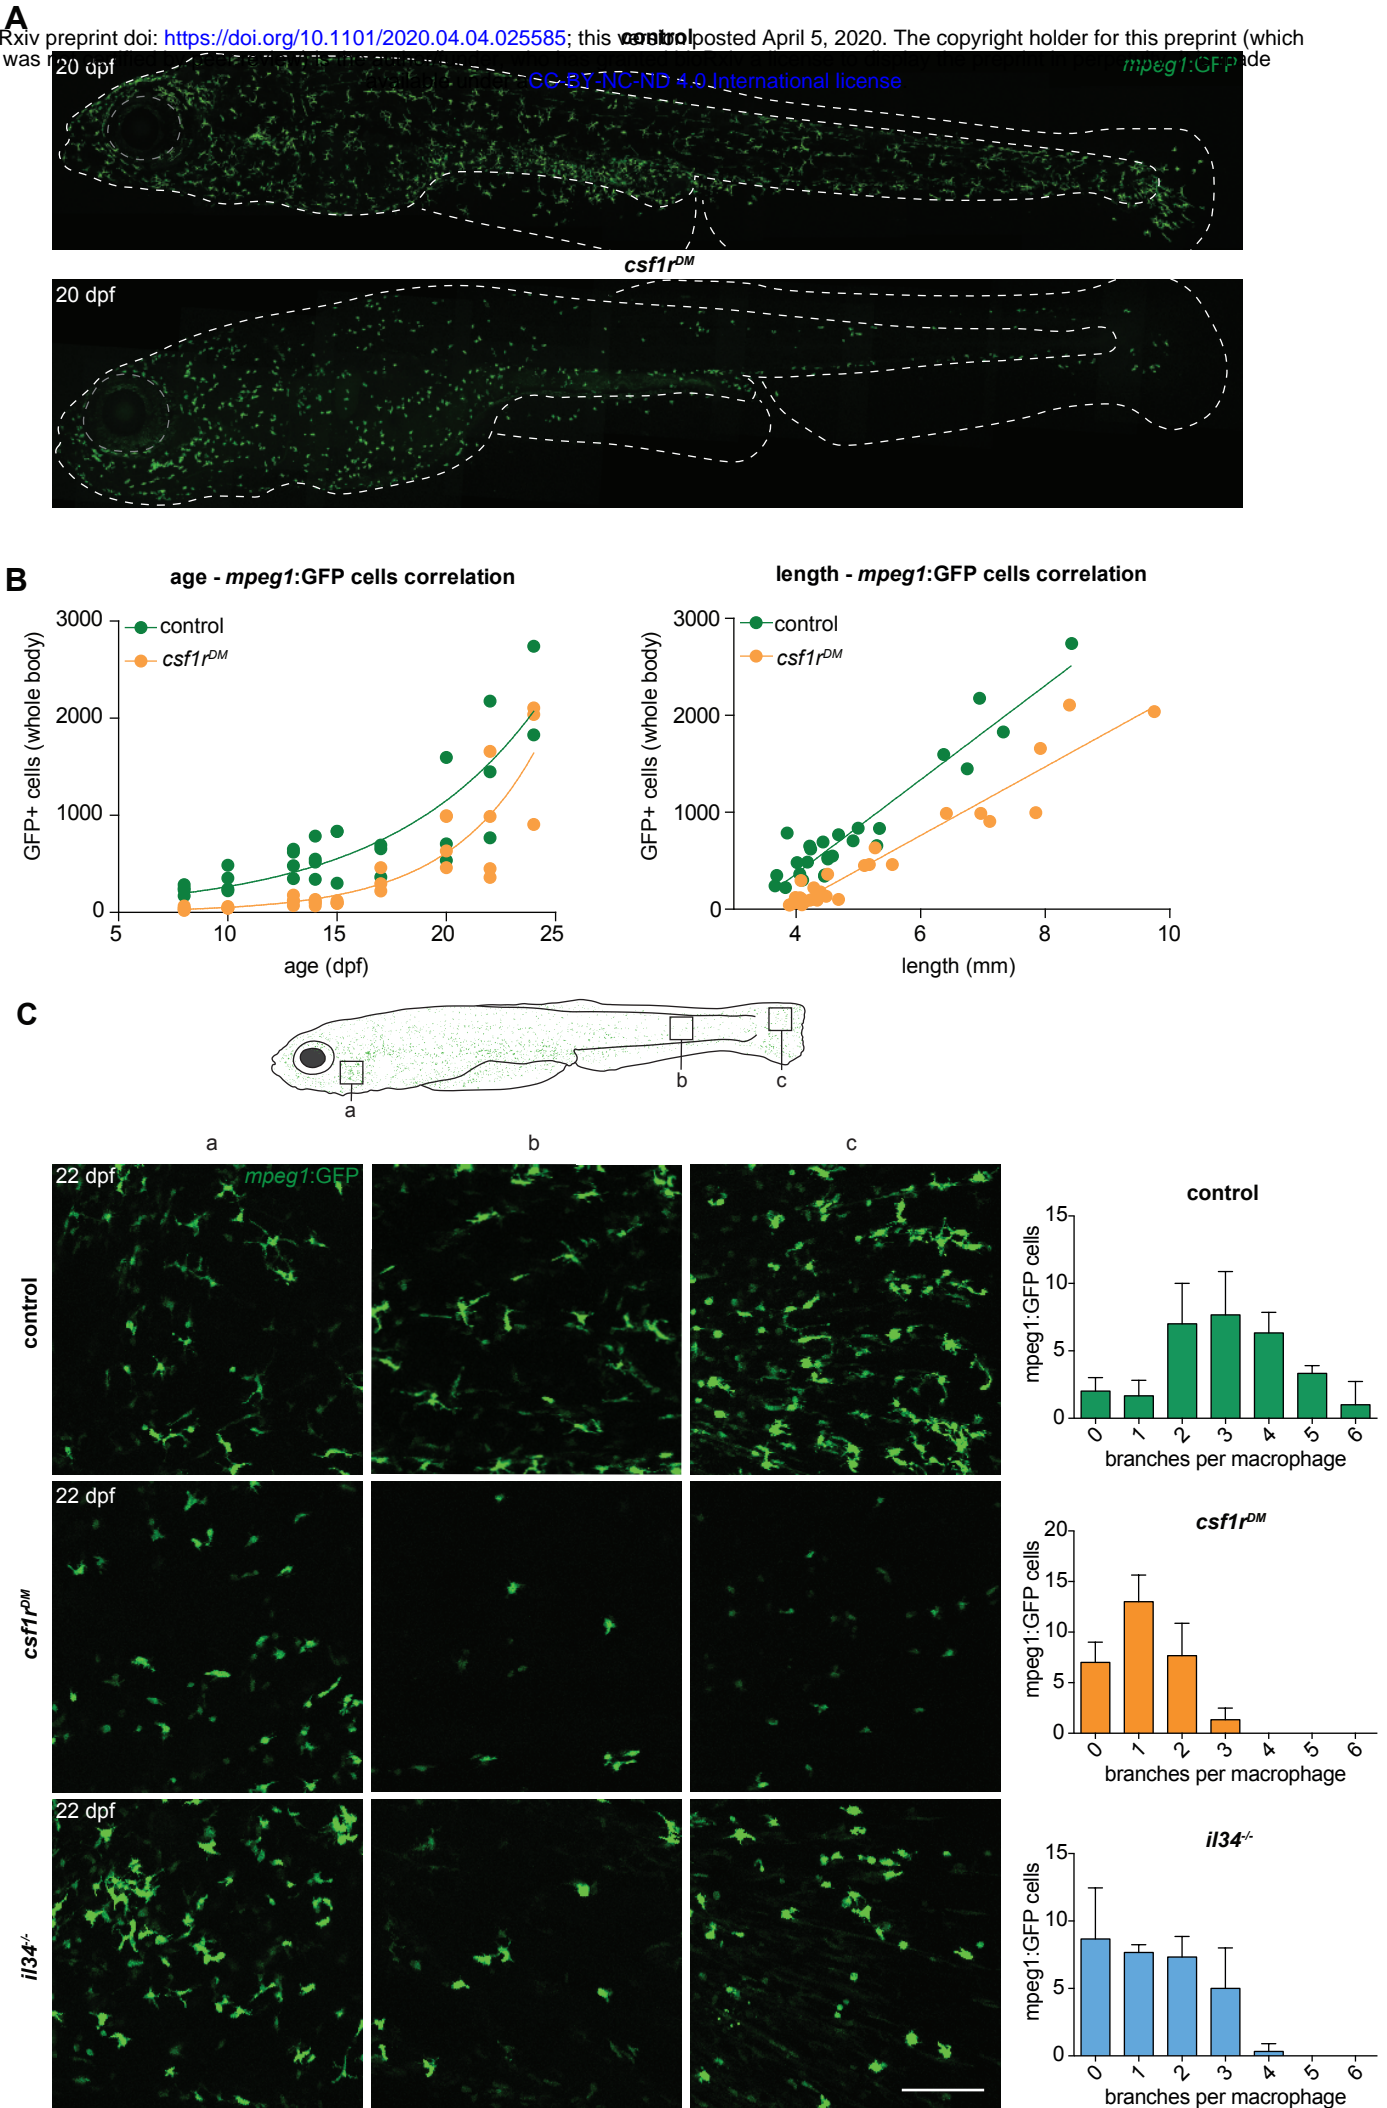

**Figure 5**

**A**

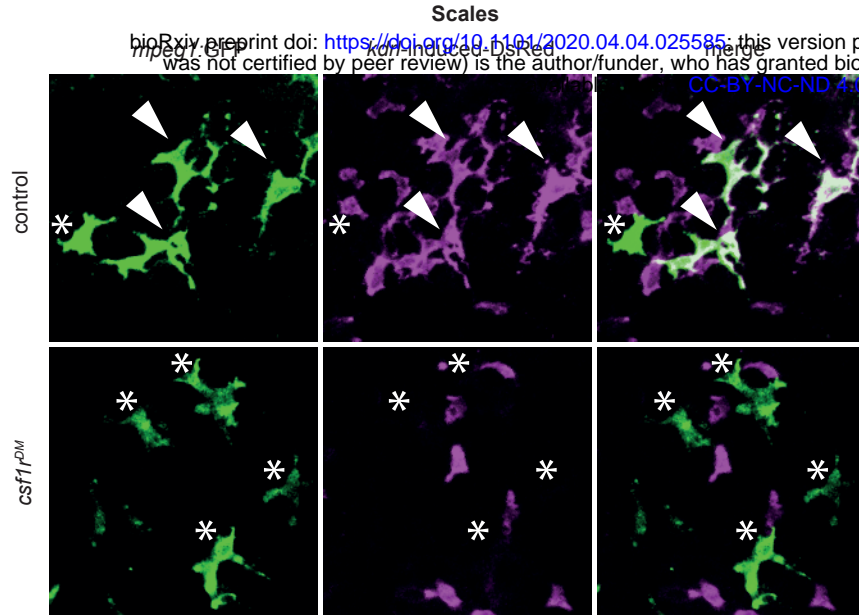

**B**

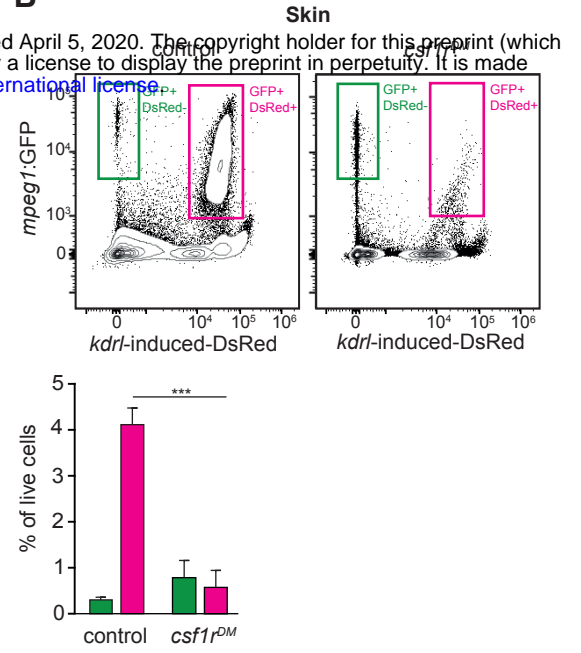

**C**

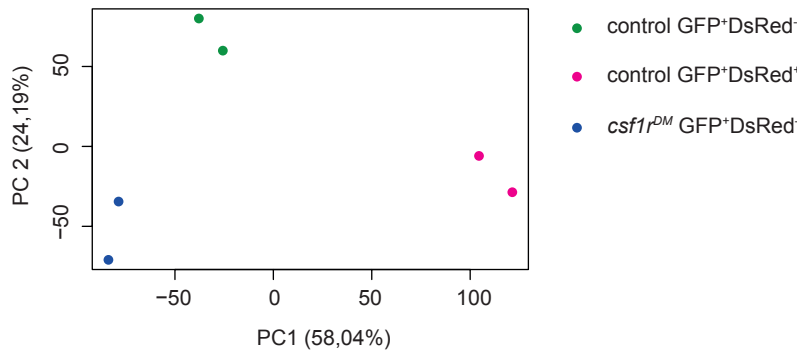

**D**

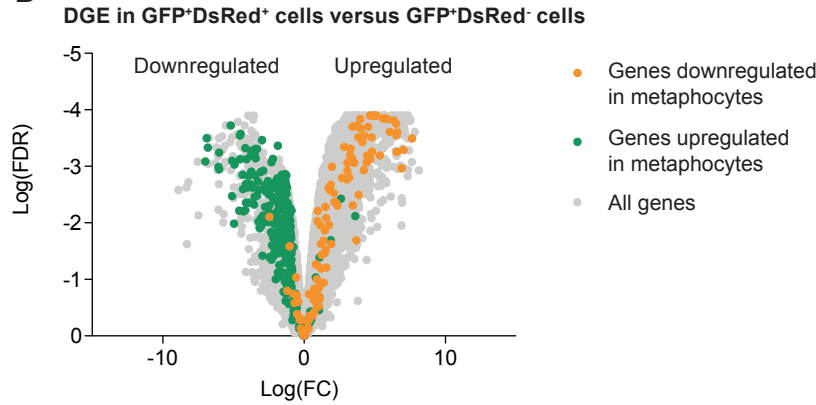

**F**

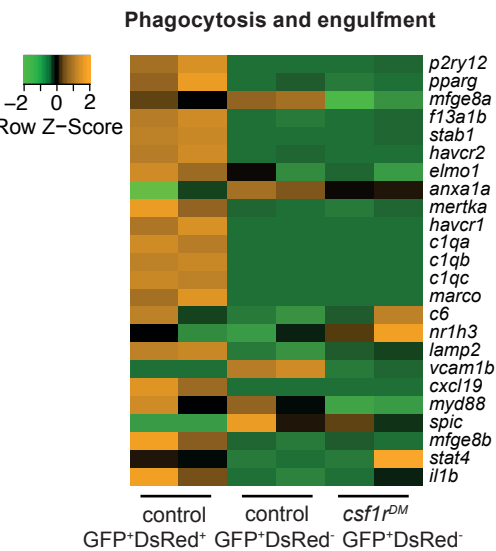

**G**

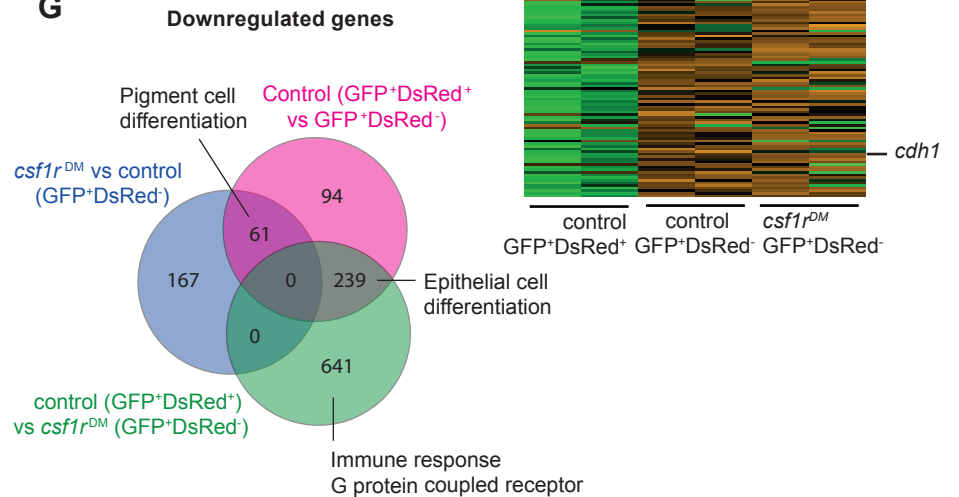

**E**

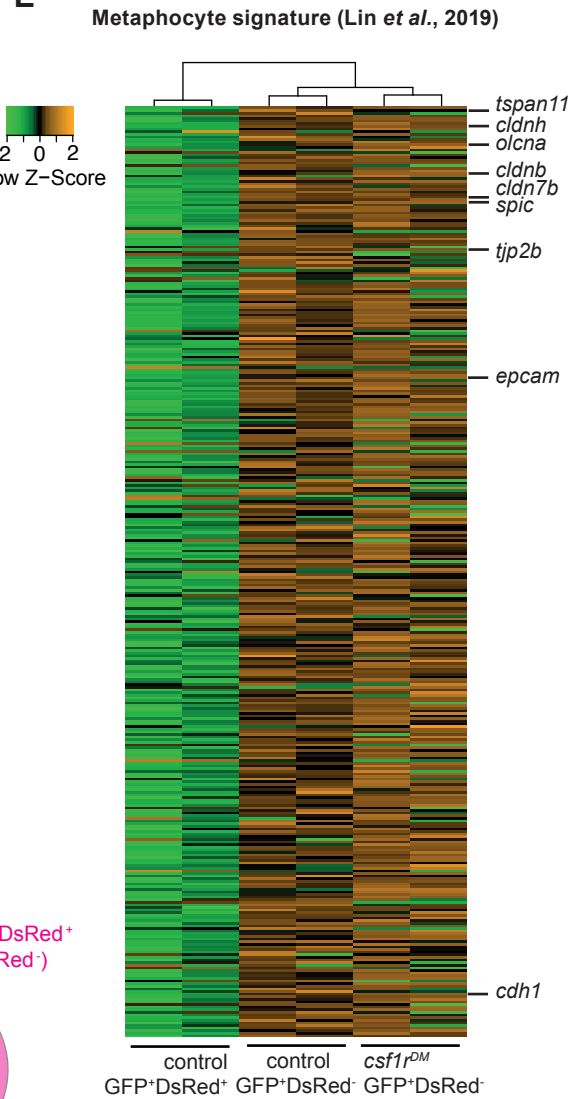

**Figure 6.**

bioRxiv preprint doi: <https://doi.org/10.1101/2020.04.04.025585>; this version posted April 5, 2020. The copyright holder for this preprint (which was not certified by peer review) is the author/funder, who has granted bioRxiv a license to display the preprint in perpetuity. It is made available under aCC-BY-NC-ND 4.0 International license.

**A**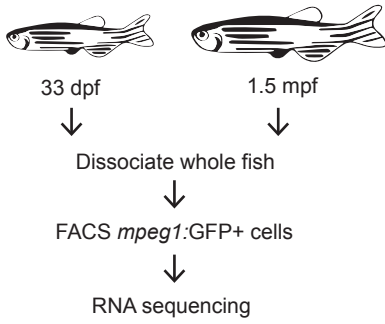**B**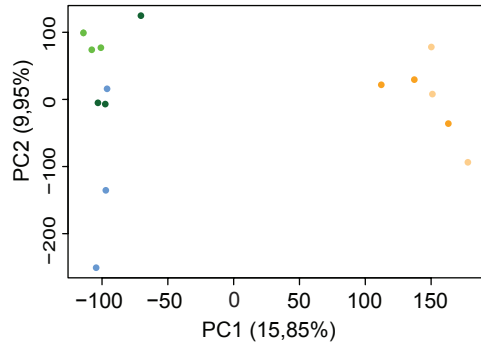**C****Genes enriched in metaphocytes (Lin et al., 2019)**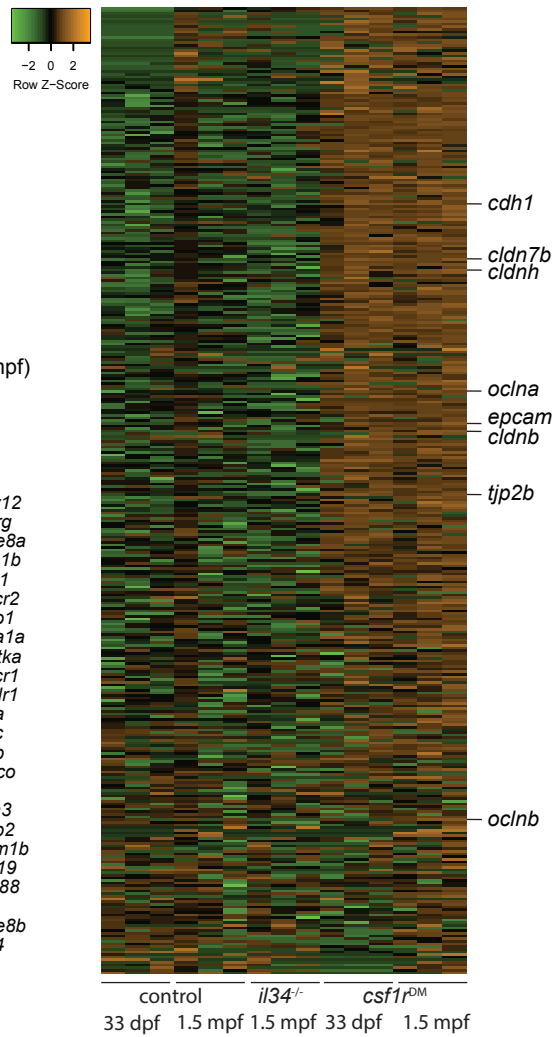**D**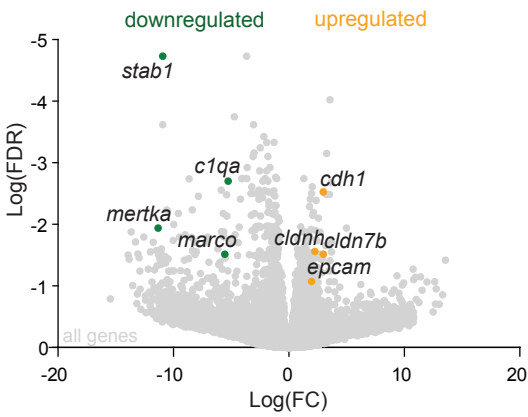**E**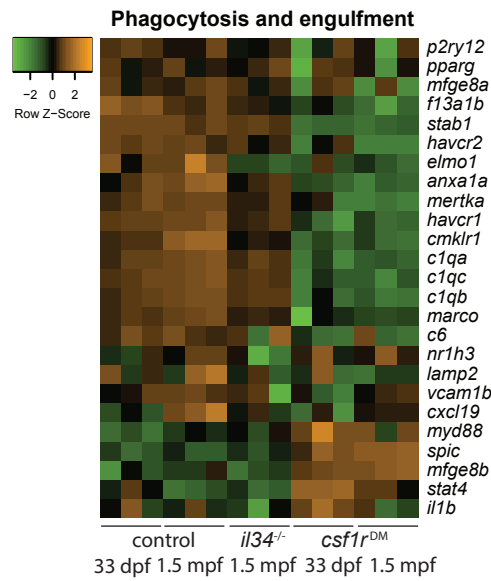**F**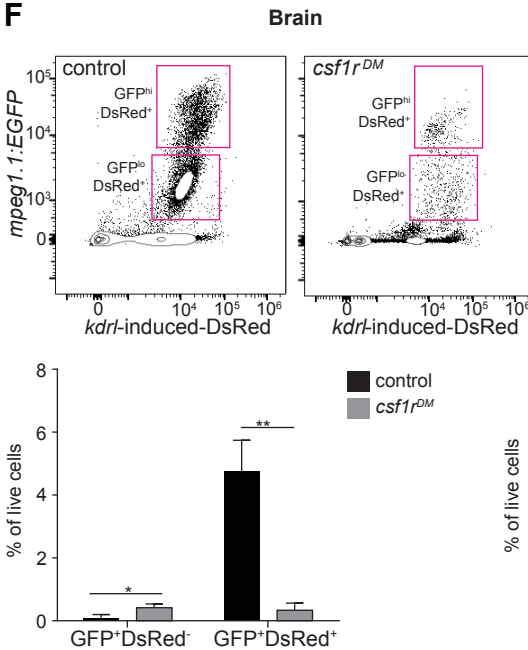**G**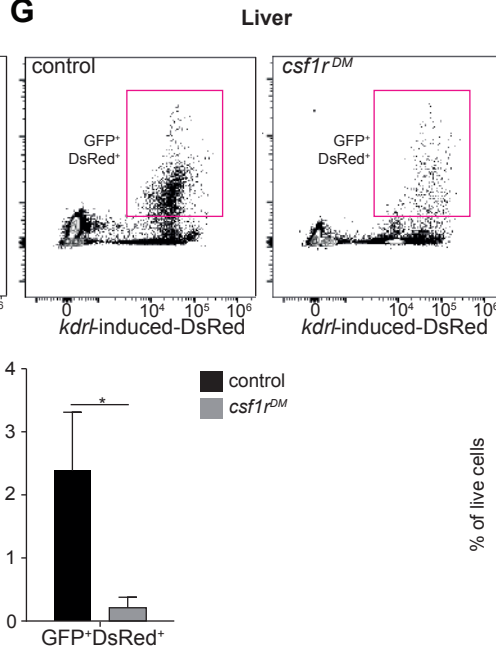**H**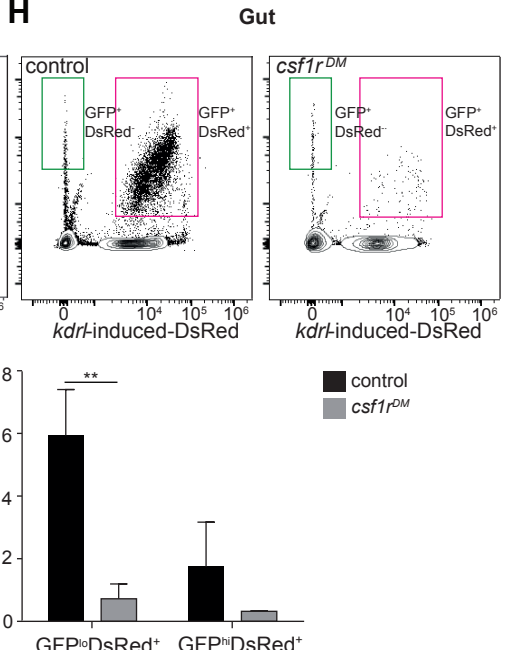

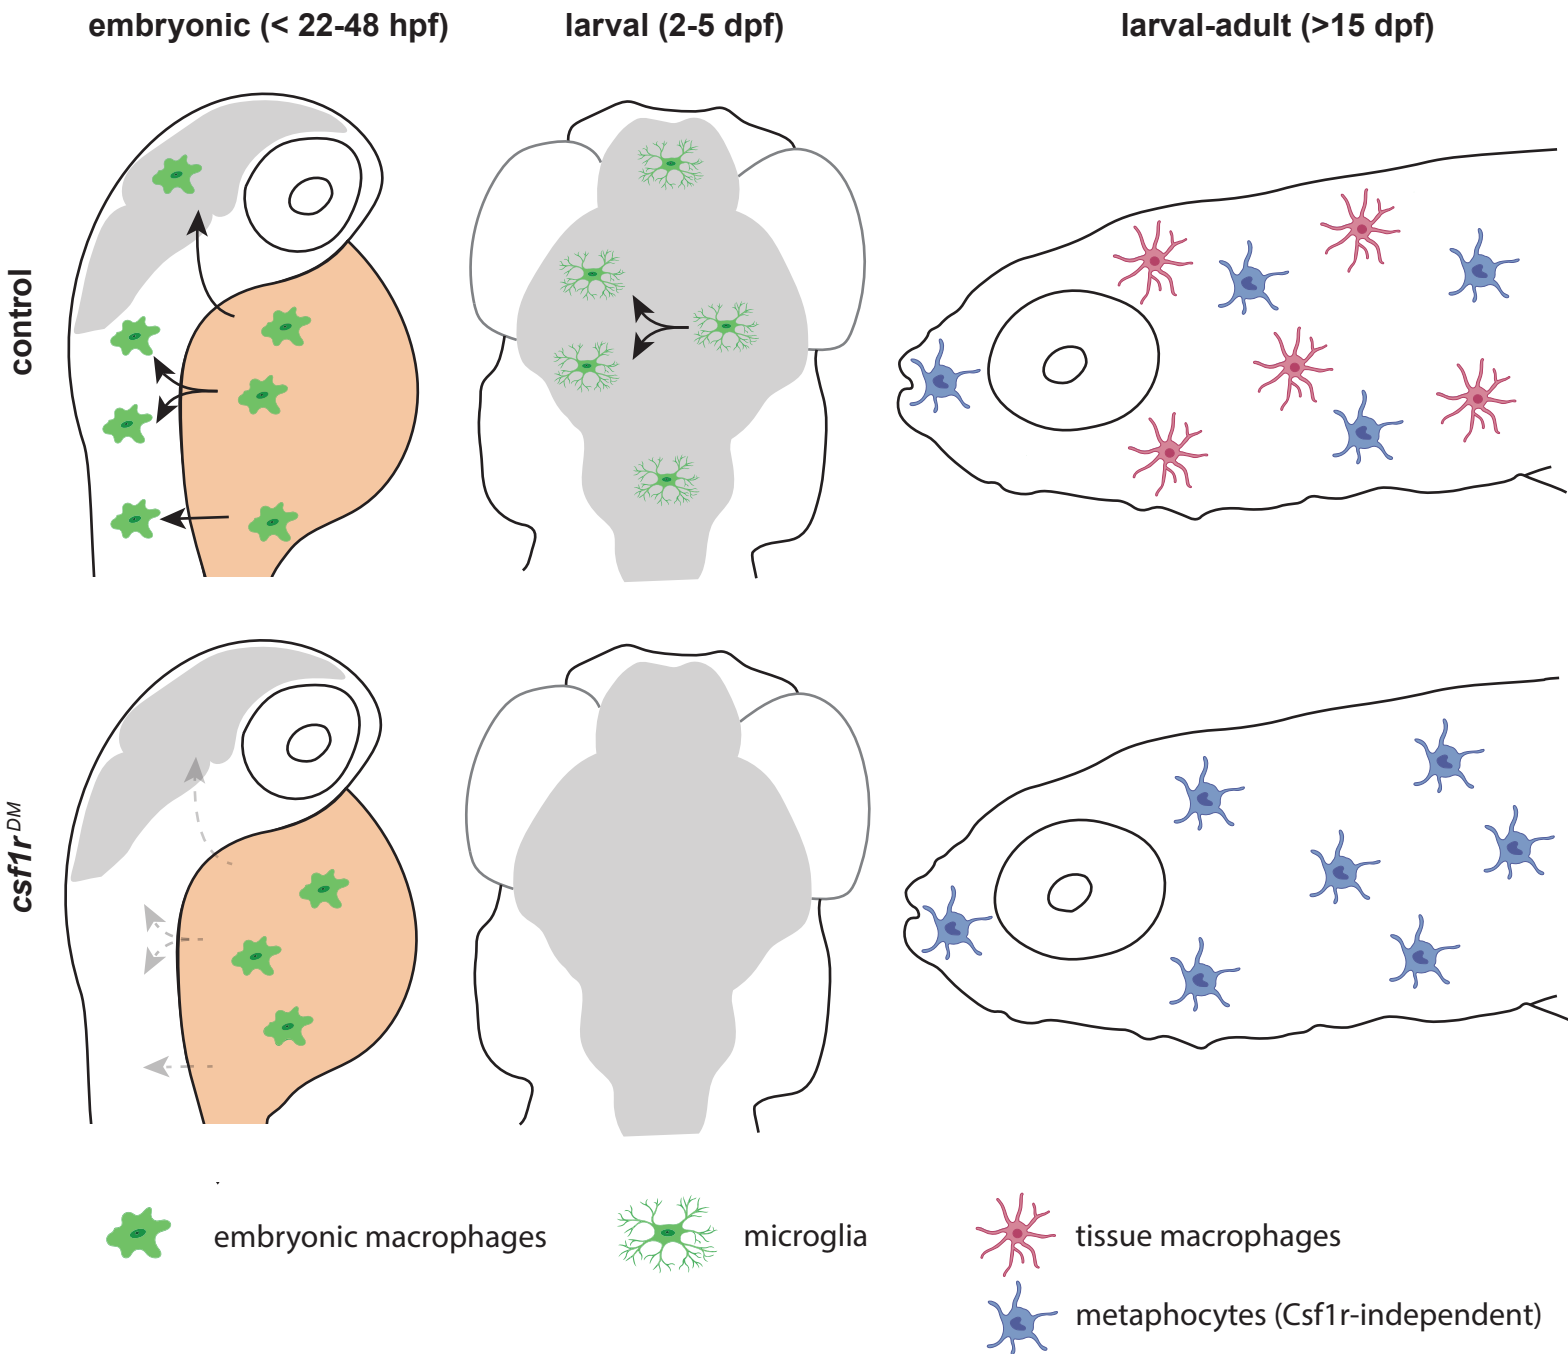

Source: https://www.biorxiv.org/content/10.1101/2020.04.04.025585v1.full.pdf
